# Supplementary material for: A new microwave-assisted thionation-heterocyclization process leading to benzo[c]thiophene-1(3H)-thione and 1H-isothiochromene-1-thione derivatives
Source: Royal Society of Chemistry journal article supplement (doi:10.1039/c6ra01329e), 2016-01-01
Supplement: c6ra01329e1.pdf [file c6ra01329e1.pdf]

## Supplementary Information for

### **A new microwave-assisted thionation-heterocyclization process leading to benzo[*c*]thiophene-1(3*H*)-thione and 1*H*-isothiochromene-1-thione derivatives**

Salvatore V. Giofrè,<sup>\*a</sup> Roberto Romeo,<sup>a</sup> Raffaella Mancuso,<sup>\*b</sup> Nicola Cicero,<sup>c</sup> Nicola Corriero,<sup>d</sup> Ugo Chiacchio,<sup>e</sup> Giovanni Romeo<sup>a</sup> and Bartolo Gabriele<sup>\*b</sup>

*a* Dipartimento di Scienze Chimiche, Biologiche, Farmaceutiche ed Ambientali, Università di Messina, Via S.S. Annunziata, 98168 Messina, Italy. E-mail: [sgiofre@unime.it](mailto:sgiofre@unime.it)

*b* Laboratory of Industrial and Synthetic Organic Chemistry (LISOC), Dipartimento di Chimica e Tecnologie Chimiche, Università della Calabria, Via P. Bucci, 12/C, 87036 Arcavacata di Rende (CS), Italy. E-mail: [raffaella.mancuso@unical.it](mailto:raffaella.mancuso@unical.it); [bartolo.gabriele@unical.it](mailto:bartolo.gabriele@unical.it)

*c* Dipartimento di Scienze biomediche, odontoiatriche e delle immagini morfologiche e funzionali, Università di Messina, Via Consolare Valeria, 98125 Messina, Italy.

*d* Istituto di Cristallografia, CNR, Via Amendola 122, 70126 Bari, Italy.

*e* Dipartimento di Chimica, Università di Catania, Viale A. Doria, 95100 Catania, Italy

## Table of Contents

|                                                                                   |                |
|-----------------------------------------------------------------------------------|----------------|
| <b>General Information</b>                                                        | <b>S2</b>      |
| <b>Experimental Procedures and Characterization Data for Products</b>             | <b>S3-S10</b>  |
| <b>Copy of <math>^1\text{H}</math> and <math>^{13}\text{C}</math> NMR spectra</b> | <b>S11-S28</b> |
| <b>1D Selective NOESY spectra for products 2a, 2d, and 3d</b>                     | <b>S29-S33</b> |
| <b>Computational methods</b>                                                      | <b>S34-S39</b> |
| <b>X-ray crystallographic data for product 2a</b>                                 | <b>S40-S43</b> |
| <b>X-ray crystallographic data for product 3d</b>                                 | <b>S44-S48</b> |
| <b>References</b>                                                                 | <b>S49</b>     |

## General Information

Solvents and reagents were commercially available. Microwave assisted syntheses were performed using a microwave oven CEM Discover in sealed reaction vessels. The temperature was monitored using a vertically focused IR temperature sensor. In order to have a homogenous system, all the batches were started with a ramp time of 120 seconds, and when the temperature program was completed a cooling period of 10 minutes was included. ESI-HRMS were determined with a Thermo Fischer Scientific LTQ Orbitrap XL. NMR spectra ( $^1\text{H}$  NMR at 500 MHz,  $^{13}\text{C}$  NMR at 126 MHz) were recorded with Varian instruments; chemical shifts are reported in ppm relative to  $\text{CDCl}_3$  (7.26 ppm). Merck silica gel 60-F254 precoated aluminum plates were used for thin-layer chromatographic separations. Flash chromatography was performed on Merck silica gel (200–400 mesh). Preparative separations were carried out by a MPLC Büchi C-601 by using Merck silica gel 0.040–0.063 mm.

## Experimental Procedures and Characterization Data for Products

### Synthesis of 2-alkynylbenzoic acid derivatives **1**

Starting materials **1** were prepared by Sonogashira coupling between methyl 2-iodobenzoates (prepared by esterification of commercially available 2-iodobenzoic acids) followed by hydrolysis, according to Scheme S1.

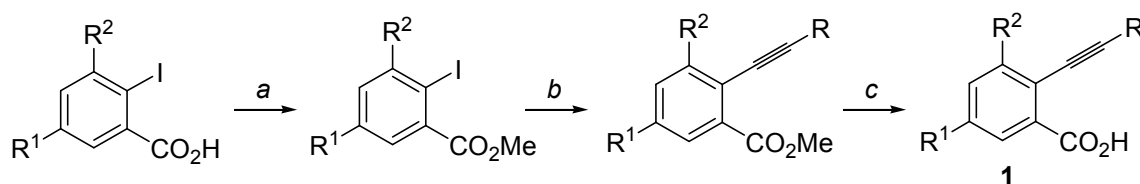

**Scheme S1.** Preparation of starting materials **1**. Reagents and conditions: *a*) MeOH, H<sub>2</sub>SO<sub>4</sub>, 2.5 h, reflux; *b*) 1-alkyne (1.5 eq.), Et<sub>3</sub>N (1.5 eq.), Pd(PPh<sub>3</sub>)<sub>4</sub> (0.12 eq.), CuI (0.2 eq), THF, 4 h, 50 °C; yield 80-90%; *c*) 2 N NaOH, 2 h, rt.

The intermediate methyl 2-alkynylbenzoates, purified by flash chromatography using cyclohexane/ethyl acetate 95:5 as eluent, were obtained in good yields (80-90%, Table S1). Different experimental conditions were then tested for their hydrolysis, to avoid the formation of the cyclic derivatives originated from *O*-heterocyclization. The best results were obtained by treatment with 2N NaOH at r.t and subsequent acidification. In this way, pure 2-alkynylbenzoic acids **1** were obtained in good to excellent yields, by crystallization from ethyl acetate/hexane (1:4) (82-93%, Table S1).

**Table S1.** Isolated yields of methyl 2-alkynylbenzoates and 2-alkynylbenzoic acids **1**

| Entry | R                                      | Methyl 2-alkynylbenzoate                                                            | Yield (%) | 2-Alkynylbenzoic acid <b>1</b>                                                                     | Yield (%) |
|-------|----------------------------------------|-------------------------------------------------------------------------------------|-----------|----------------------------------------------------------------------------------------------------|-----------|
| 1     | Ph                                     | 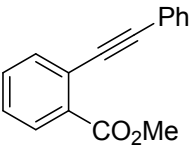   | 90        | <br><b>1a</b>   | 93        |
| 2     | Ph                                     |    | 89        | <br><b>1b</b>   | 90        |
| 3     | Ph                                     |    | 90        | <br><b>1c</b>   | 92        |
| 4     | 4-MeO-C <sub>6</sub> H <sub>4</sub>    |   | 90        | <br><b>1d</b>   | 90        |
| 5     | 4-pentyl-C <sub>6</sub> H <sub>4</sub> |  | 89        | <br><b>1e</b>  | 85        |
| 6     | 4-FC <sub>6</sub> H <sub>4</sub>       |  | 85        | <br><b>1f</b> | 82        |
| 7     | Propyl                                 |  | 80        | <br><b>1g</b> | 86        |

### **Sonogashira coupling of methyl 2-iodobenzoates with 1-alkynes to give methyl 2-alkynylbenzoates**

A stirred suspension of the methyl 2-iodobenzoate (3.80 mmol), Pd(PPh<sub>3</sub>)<sub>4</sub> (0.46 mmol), CuI (0.76 mmol), the 1-alkyne (5.70 mmol), and Et<sub>3</sub>N (5.70 mmol) in anhydrous and deoxygenated THF (15.0 mL) was heated under nitrogen at 50 °C for 4 h. The volatiles were evaporated, and the residue was purified by flash chromatography (cyclohexane/ethyl acetate, 95:5) to give methyl 2-alkynylbenzoates, purified by flash chromatography using cyclohexane/ethyl acetate 95:5 as eluent, in 80-90% yields (Table S1).

### **General procedure for hydrolysis of methyl 2-alkynylbenzoates to 2-alkynylbenzoic acids 1**

To a solution of the methyl 2-alkynylbenzoate (1.0 mmol, 1.0 equiv.), dissolved in a mixture of methanol (20 mL) and ethanol (10 mL), was added 2N NaOH (7 mL). After stirring for 2 h at rt, TLC analysis showed that all the starting material was converted, and the solution was concentrated under reduced pressure. The residue was dissolved in water (30 mL) and washed with diethyl ether (2 x 20 mL). After acidification to pH = 4-5, the aqueous layer was extracted with ethyl acetate (3 x 30 mL). The combined organic layers were dried (Na<sub>2</sub>SO<sub>4</sub>) and concentrated under reduced pressure to give 2-alkynylbenzoic acids **1** in high yields (82-93%, Table S1).

## General procedure for the tandem thionation-heterocyclization of 2-alkynylbenzoic acids **1** to benzo[*c*]thiophene-1(3*H*)-thiones **2** and 1*H*-isothiochromene-1-thiones **3**

A sealed tube (10 mL) was charged with a solution of **1** (0.45 mmol) and the Lawesson's reagent (0.182 g, 0.45 mmol) in CH<sub>2</sub>Cl<sub>2</sub> (3 mL). The mixture was irradiated under microwave conditions at 300 W and 100 °C for 1 h. After cooling, the reaction mixture was concentrated under reduced pressure and the product purified by MPLC (medium pressure liquid chromatography) using 9:1 cyclohexane/CH<sub>2</sub>Cl<sub>2</sub> as eluent.

### Characterization data for products **2** and **3**

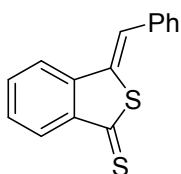

(*Z*)-3-Benzylidenebenzo[*c*]thiophene-1(3*H*)-thione (**2a**) Red crystals (Yield: 103 mg, 90%) mp 121-123 °C; *R<sub>f</sub>* 0.51 cyclohexane/CH<sub>2</sub>Cl<sub>2</sub> (8:2). <sup>1</sup>H NMR (500 MHz, CDCl<sub>3</sub>) δ = 8.11 (d, *J* = 7.9, 1H), 7.94 (d, *J* = 8.0, 1H), 7.71 (t, *J* = 7.7, 1H), 7.62 (d, *J* = 7.7, 2H), 7.53 (s, 1H), 7.50 (d, *J* = 7.8, 1H), 7.46 (t, *J* = 7.6, 2H), 7.38 (t, *J* = 7.4, 1H). <sup>13</sup>C NMR (126 MHz, CDCl<sub>3</sub>) δ = 219.54, 143.47, 141.87, 137.06, 135.49, 132.81, 130.05, 129.37, 129.28, 129.12, 128.85, 124.16, 123.09, 120.61. HRMS-ESI: *m/z* [M+H]<sup>+</sup> calcd for C<sub>15</sub>H<sub>11</sub>S<sub>2</sub>: 255.0302; found 255.0299.

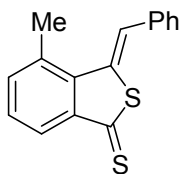

*(Z)*-3-Benzylidene-4-methylbenzo[*c*]thiophen-1(3*H*)-thione (**2b**) Red crystals (Yield:103 mg, 91%) mp 107-109 °C;  $R_f$  0.47 Cyclohexane/CH<sub>2</sub>Cl<sub>2</sub> (8:2). <sup>1</sup>H NMR (500 MHz, CDCl<sub>3</sub>)  $\delta$  = 8.06 (d,  $J$  = 7.9, 1H), 7.69 (s, 1H), 7.58 (d,  $J$  = 7.7, 2H), 7.52 (d,  $J$  = 7.3, 1H), 7.45 (t,  $J$  = 7.6, 2H), 7.41 – 7.33 (m, 2H), 2.84 (s, 3H). <sup>13</sup>C NMR (126 MHz, CDCl<sub>3</sub>)  $\delta$  = 220.00, 143.38, 140.00, 139.89, 136.57, 136.50, 134.45, 129.91, 129.09, 128.96, 128.56, 128.12, 122.81, 23.19. HRMS-ESI:  $m/z$  [M+H]<sup>+</sup> calcd for C<sub>16</sub>H<sub>13</sub>S<sub>2</sub> : 269.0459; found: 269.0456.

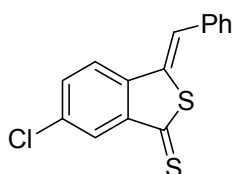

*(Z)*-3-Benzylidene-6-chlorobenzo[*c*]thiophene-1(3*H*)-thione (**2c**) Red crystals (Yield: 96 mg, 85%) mp 186-188 °C;  $R_f$  0.60 Cyclohexane/CH<sub>2</sub>Cl<sub>2</sub> (8:2). <sup>1</sup>H NMR (500 MHz, CDCl<sub>3</sub>)  $\delta$  = 8.05 (d,  $J$  = 1.6, 1H), 7.87 (d,  $J$  = 8.5, 2H), 7.65 (dd,  $J$  = 8.5, 1.6, 2H), 7.60 (d,  $J$  = 7.8, 3H), 7.49 (s, 2H), 7.48 – 7.44 (m, 3H), 7.39 (t,  $J$  = 7.2, 1H). <sup>13</sup>C NMR (126 MHz, CDCl<sub>3</sub>)  $\delta$  = 217.36, 142.72, 141.63, 136.17, 136.04, 135.25, 132.66, 130.05, 129.37, 123.77, 123.71, 121.71. HRMS-ESI:  $m/z$  [M+H]<sup>+</sup> calcd for C<sub>15</sub>H<sub>10</sub>ClS<sub>2</sub> : 288.9912; found: 288.9903.



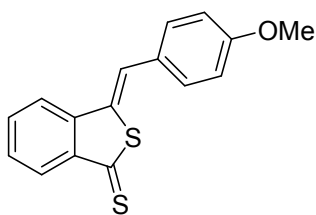

*(Z)*-3-(4-Methoxybenzylidene)benzo[*c*]thiophene-1(3*H*)-thione (**2d**) Amorphous red solid (Yield: 6 mg, 5%) mp 135-137 °C;  $R_f$  0.23 Cyclohexane/CH<sub>2</sub>Cl<sub>2</sub> (8:2). <sup>1</sup>H NMR (500 MHz, CDCl<sub>3</sub>)  $\delta$  = 8.11 (d,  $J$ =7.9, 1H), 7.92 (d,  $J$ =8.0, 1H), 7.69 (ddd,  $J$ =8.1, 7.2, 1.2, 1H), 7.58 (d,  $J$ =8.8, 2H), 7.51 – 7.46 (m, 2H), 6.99 (d,  $J$ =8.8, 2H), 3.87 (s, 3H). <sup>13</sup>C NMR (126 MHz, CDCl<sub>3</sub>)  $\delta$  = 219.08, 160.50, 143.83, 1.41.77, 134.54, 132.69, 131.83, 128.89, 128.22, 124.19, 123.16, 120.42, 114.85, 55.56. HRMS-ESI:  $m/z$  [M+H]<sup>+</sup> calcd for C<sub>16</sub>H<sub>13</sub>OS<sub>2</sub> : 285.0408; found: 285.0404.

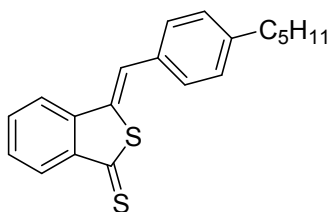

*(Z)*-3-(4-Pentylbenzylidene)benzo[*c*]thiophene-1(3*H*)-thione (**2e**) Red oil (Yield: 78 mg, 70%);  $R_f$  0.61 Cyclohexane/CH<sub>2</sub>Cl<sub>2</sub> (8:2). <sup>1</sup>H NMR (500 MHz, CDCl<sub>3</sub>)  $\delta$  = 8.11 (ddd,  $J$  = 7.9, 1.0, 0.6, 1H), 7.93 (d,  $J$  = 8.1, 1H), 7.69 (ddd,  $J$  = 8.1, 7.2, 1.2, 1H), 7.54 (d,  $J$  = 8.1, 2H), 7.51 (s, 1H), 7.50 – 7.47 (m, 1H), 7.27 (d,  $J$  = 8.3, 2H), 2.72 – 2.58 (m, 3H), 1.70 – 1.60 (m, 3H), 1.38 – 1.32 (m, 4H), 0.91 (t,  $J$ =7.0, 3H). <sup>13</sup>C NMR (126 MHz, CDCl<sub>3</sub>)  $\delta$  = 219.41, 144.68, 143.66, 141.83, 135.93, 132.90, 132.73, 130.15, 129.43, 129.12, 124.14, 123.35, 120.54, 35.98, 31.64, 31.01, 22.68, 14.17. HRMS-ESI:  $m/z$  [M+H]<sup>+</sup> calcd for C<sub>20</sub>H<sub>21</sub>S<sub>2</sub> : 325.1085; found: 325.1081.

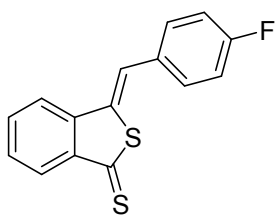

*(Z)*-3-(4-Fluorobenzylidene)benzo[*c*]thiophene-1(3*H*)-thione (**2f**) Orange solid (Yield: 100 mg, 88%) mp 147-149 °C;  $R_f$  0.43 Cyclohexane/CH<sub>2</sub>Cl<sub>2</sub> (8:2). <sup>1</sup>H NMR (500 MHz, CDCl<sub>3</sub>)  $\delta$  = 8.10 (d,  $J$  = 7.9, 1H), 7.91 (d,  $J$  = 8.1, 2H), 7.70 (t,  $J$  = 7.8, 1H), 7.59 (dd,  $J$  = 8.5, 5.4, 2H), 7.54 – 7.49 (m, 1H), 7.47 (s, 1H), 7.15 (t,  $J$  = 8.6, 2H). <sup>13</sup>C NMR (126 MHz, CDCl<sub>3</sub>)  $\delta$  = 219.15, 163.94, 162.96 (d,  $J$  = 258.7), 143.38, 141.83, 136.78 (d,  $J$  = 2.5), 135.32, 132.86, 131.83 (d,  $J$  = 8.5), 129.41, 124.17 (d,  $J$  = 6.2), 121.73 (d,  $J$  = 8.2), 120.53, 116.55 (d,  $J$  = 21.2). HRMS-ESI:  $m/z$  [M+H]<sup>+</sup> calcd for C<sub>15</sub>H<sub>10</sub>FS<sub>2</sub> : 273.0208; found: 273.0205.

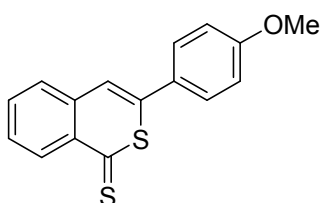

3-(4-Methoxyphenyl)-1*H*-isothiochromene-1-thione (**3d**) Amorphous coral solid (Yield: 101 mg, 90%) mp 128-130 °C;  $R_f$  0.17 Cyclohexane/CH<sub>2</sub>Cl<sub>2</sub> (8:2). <sup>1</sup>H NMR (500 MHz, CDCl<sub>3</sub>)  $\delta$  = 8.90 – 8.85 (m, 1H), 7.76 – 7.71 (m, 1H), 7.63 – 7.60 (m, 1H), 7.58 (d,  $J$  = 8.5, 2H), 7.56 – 7.53 (m, 1H), 7.52 (s, 1H), 7.00 (d,  $J$  = 8.9, 2H), 3.87 (s, 3H). <sup>13</sup>C NMR (126 MHz, CDCl<sub>3</sub>)  $\delta$  = 212.03, 161.16, 144.72, 135.36, 134.33, 133.93, 131.13, 129.37, 128.03, 121.85, 114.83, 55.58. HRMS-ESI:  $m/z$  [M+H]<sup>+</sup> calcd for C<sub>16</sub>H<sub>13</sub>OS<sub>2</sub> : 285.0408; found: 285.0401.

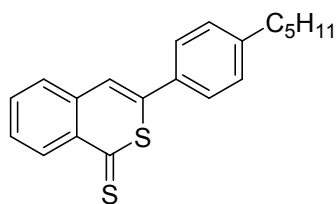

**3-(4-Pentylphenyl)-1H-isothiochromene-1-thione (3e)** Red oil (Yield: 22 mg, 20%);  $R_f$  0.45 Cyclohexane/ $\text{CH}_2\text{Cl}_2$  (8:2).  $^1\text{H}$  NMR (500 MHz,  $\text{CDCl}_3$ )  $\delta$  = 8.90 – 8.86 (m, 1H), 7.74 (ddd,  $J$  = 8.2, 7.1, 1.3, 1H), 7.65 – 7.61 (m, 1H), 7.60 – 7.55 (m, 4H), 7.54 (s, 1H), 7.29 (d,  $J$  = 8.3, 2H), 2.68 – 2.63 (m, 2H), 1.70 – 1.61 (m, 2H), 1.39 – 1.31 (m, 4H), 0.91 (t,  $J$  = 7.0, 3H).  $^{13}\text{C}$  NMR (126 MHz,  $\text{CDCl}_3$ )  $\delta$  = 212.10, 145.36, 145.00, 135.48, 134.31, 133.76, 132.96, 131.22, 129.51, 128.03, 126.56, 122.44, 35.84, 31.61, 31.10, 22.67, 14.16. HRMS-ESI:  $m/z$   $[\text{M}+\text{H}]^+$  calcd for  $\text{C}_{20}\text{H}_{21}\text{S}_2$  : 325.1085; found: 325.1079.

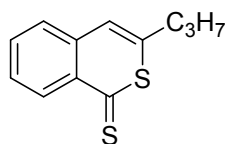

**3-Propyl-1H-isothiochromene-1-thione (3g)** Red brown oil (Yield: 100 mg, 86%);  $R_f$  0.37 Cyclohexane/ $\text{CH}_2\text{Cl}_2$  (8:2).  $^1\text{H}$  NMR (500 MHz,  $\text{CDCl}_3$ )  $\delta$  = 8.85 (d,  $J$  = 8.3, 1H), 7.71 (t,  $J$  = 7.4, 1H), 7.57 – 7.44 (m, 2H), 7.19 (s, 1H), 2.59 (t,  $J$  = 7.5, 2H), 1.77 – 1.69 (m, 2H), 1.00 (t,  $J$  = 7.3, 3H).  $^{13}\text{C}$  NMR (126 MHz,  $\text{CDCl}_3$ )  $\delta$  = 212.53, 147.11, 135.51, 134.21, 133.53, 130.46, 129.09, 127.96, 123.23, 37.59, 23.23, 13.57. HRMS-ESI:  $m/z$   $[\text{M}+\text{H}]^+$  calcd for  $\text{C}_{12}\text{H}_{13}\text{S}_2$  : 221.0459; found: 221.0456.

# Copy of $^1\text{H}$ and $^{13}\text{C}$ NMR spectra

$^1\text{H}$  NMR (500 MHz,  $\text{CDCl}_3$ ) of compound **2a**

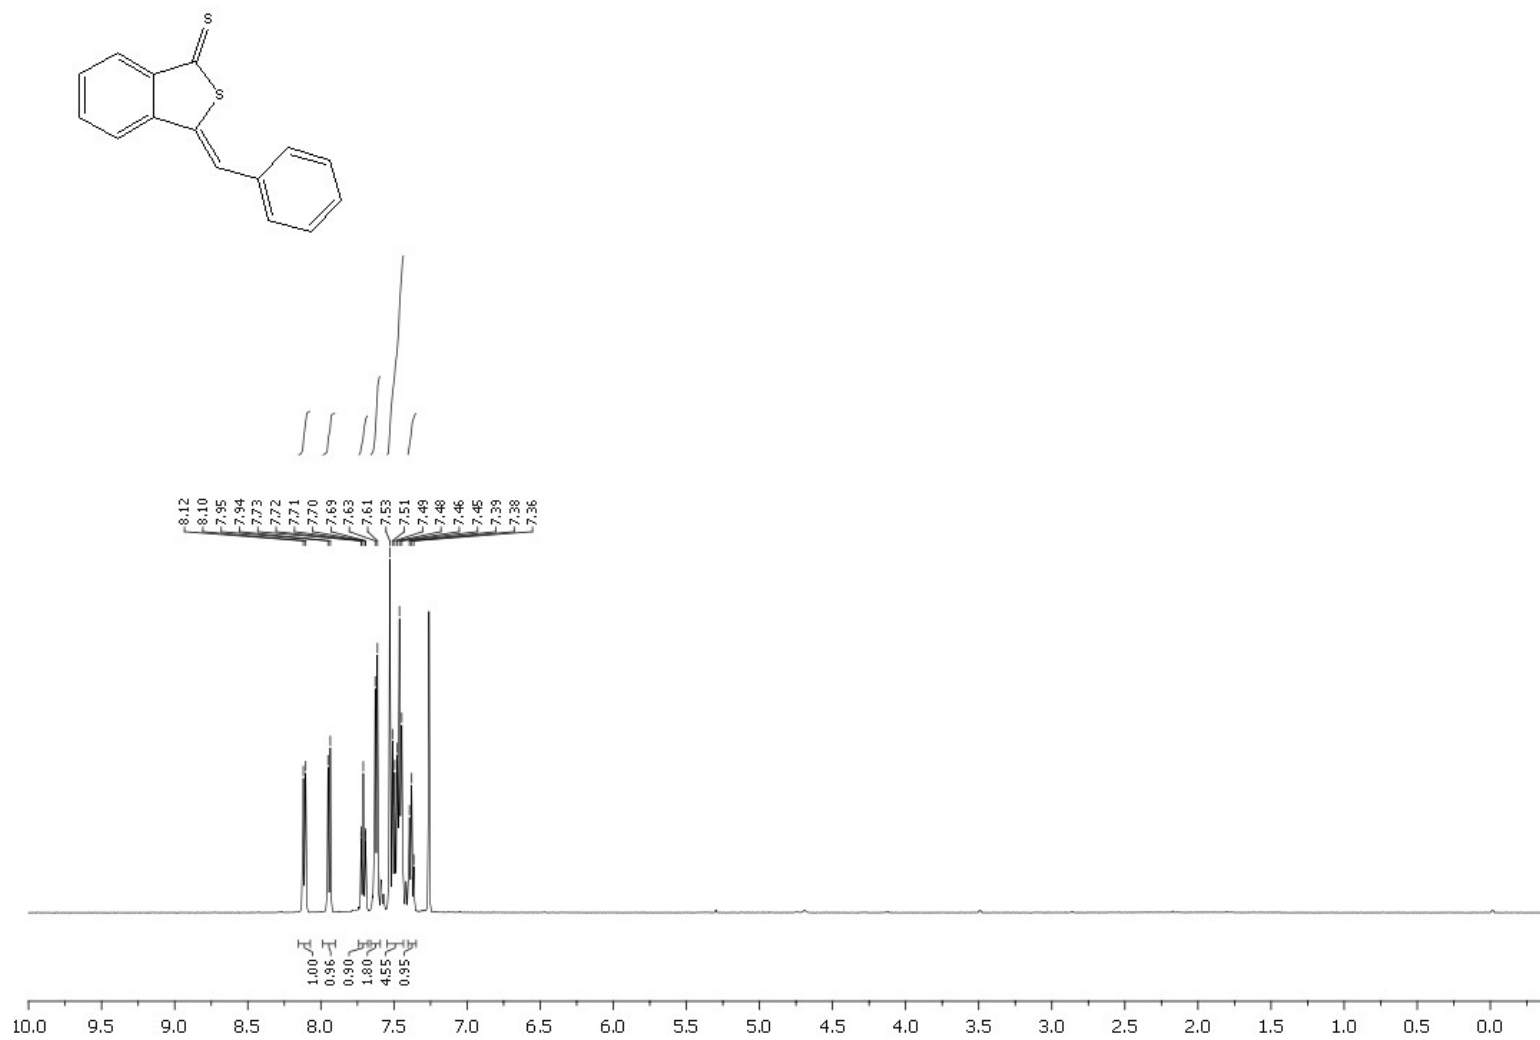

$^{13}\text{C}$  NMR (126 MHz,  $\text{CDCl}_3$ ) of compound **2a**

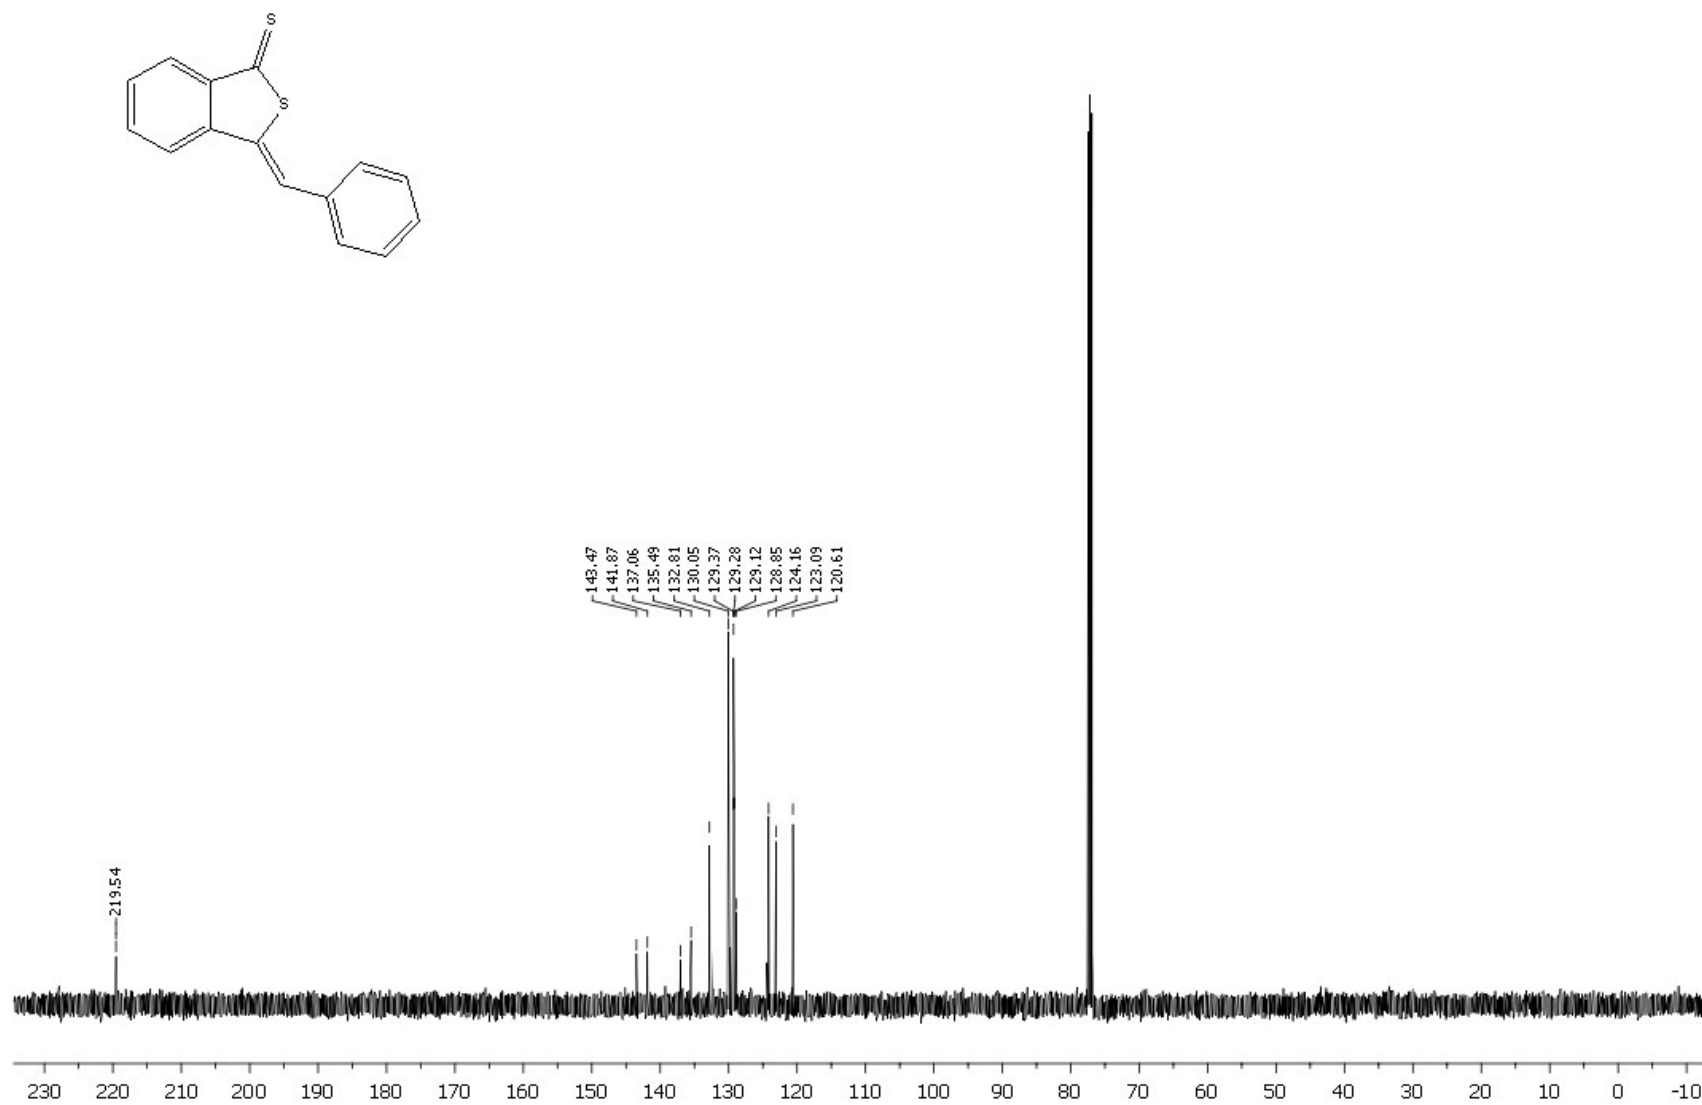

$^1\text{H}$  NMR (500 MHz,  $\text{CDCl}_3$ ) of compound **2b**

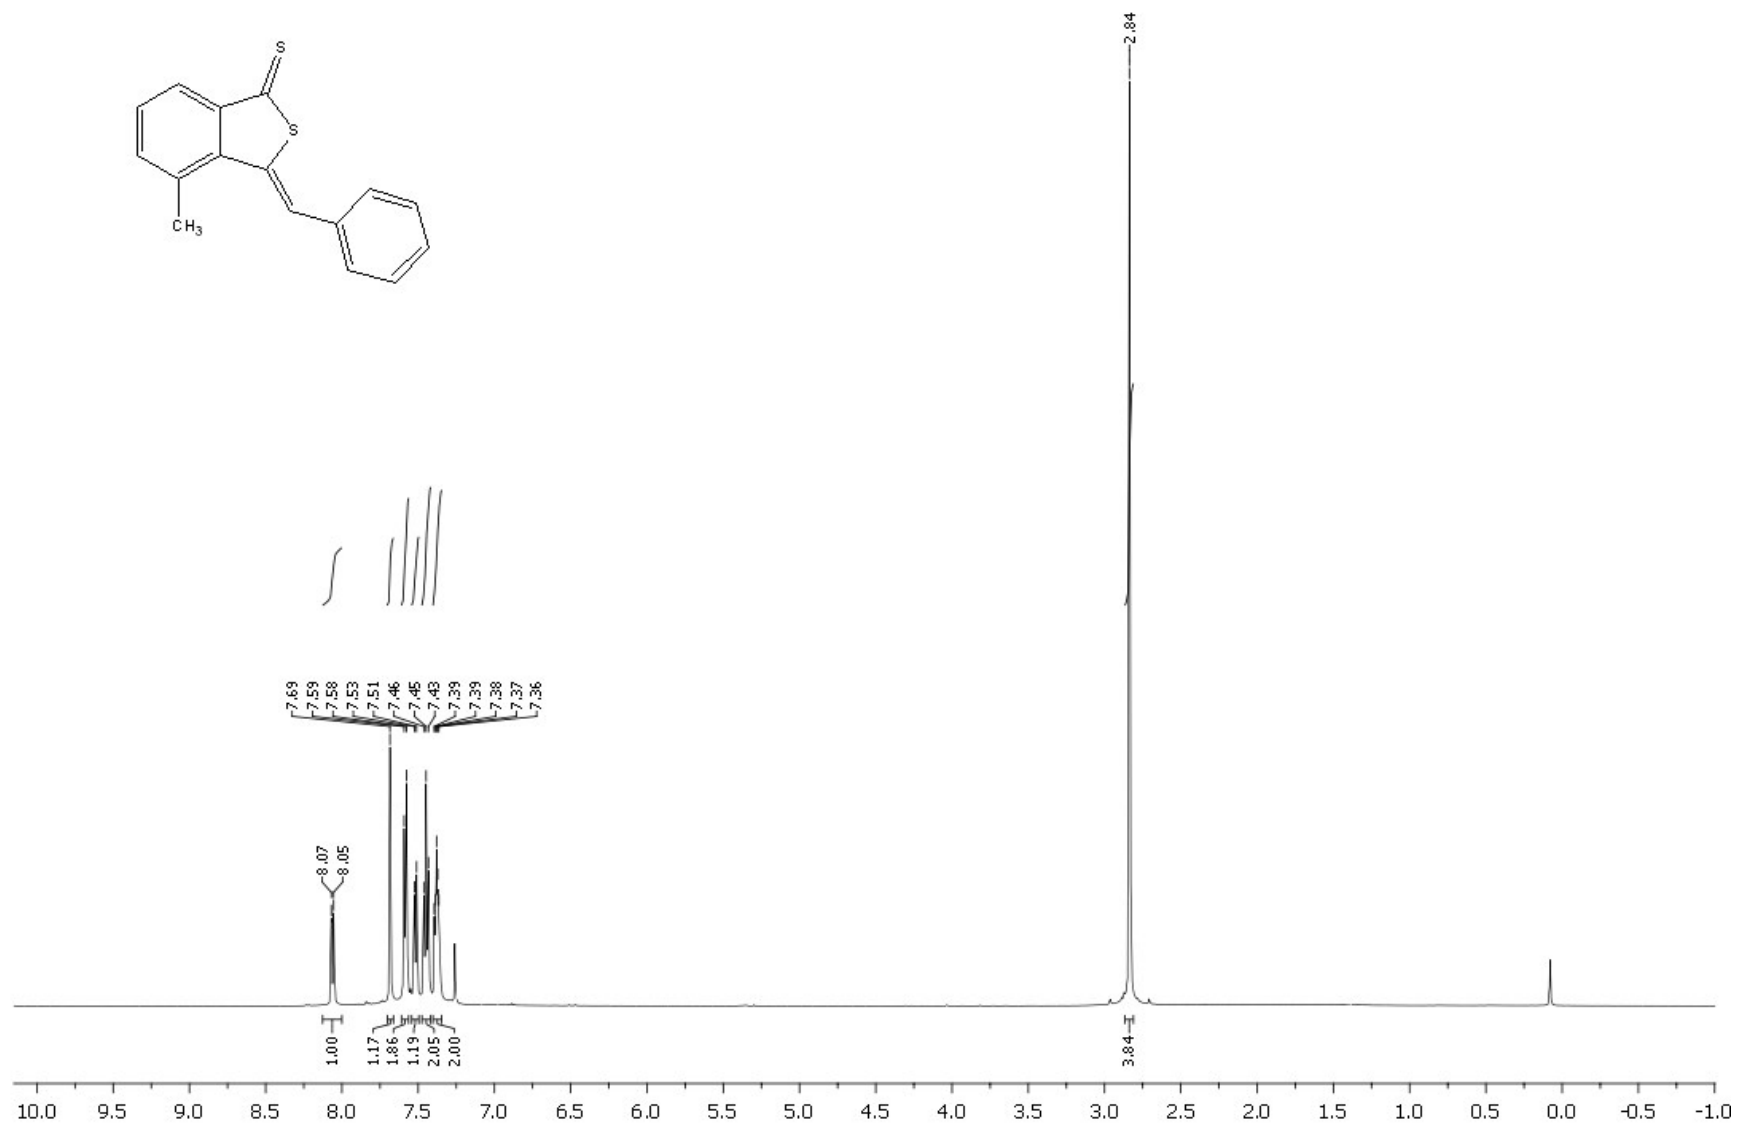

$^{13}\text{C}$  NMR (126 MHz,  $\text{CDCl}_3$ ) of compound **2b**

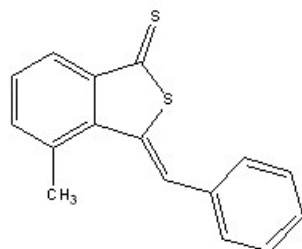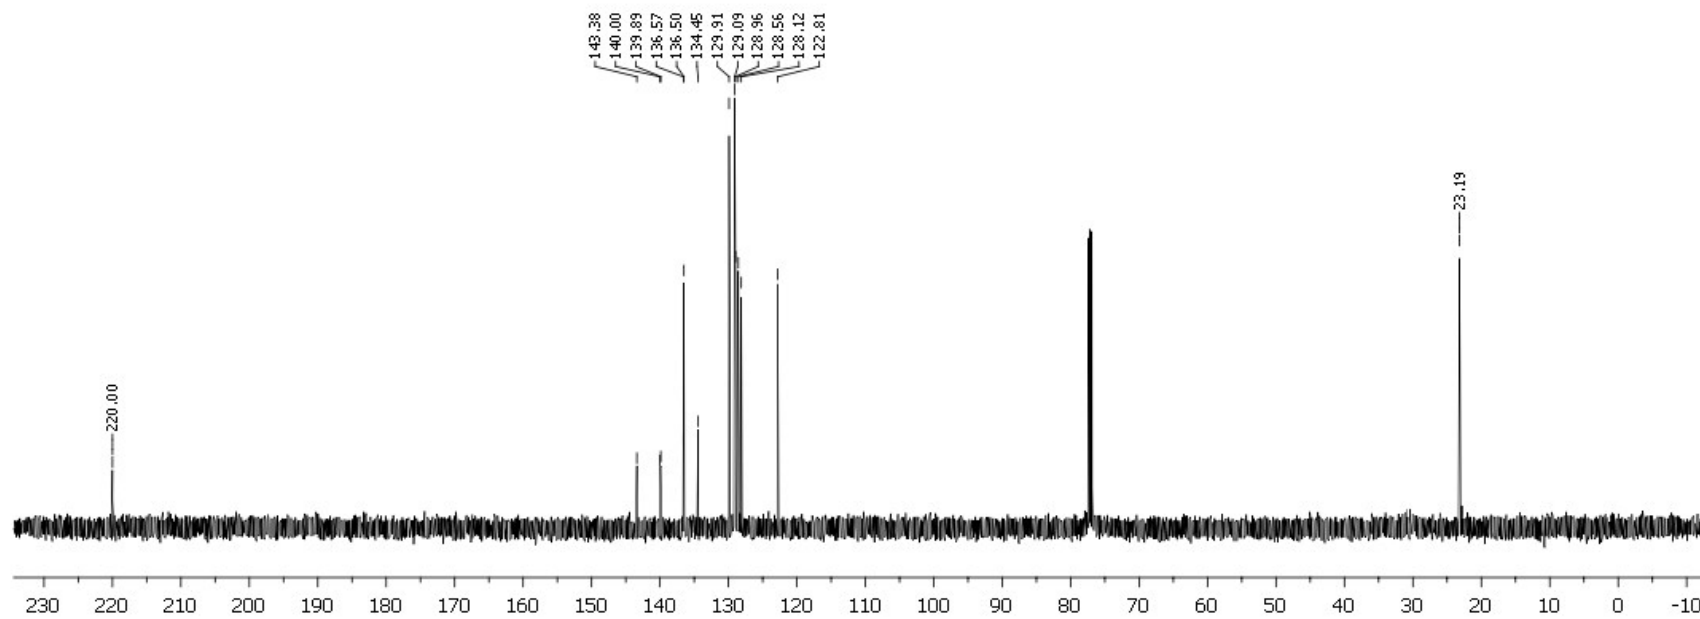

$^1\text{H}$  NMR (500 MHz,  $\text{CDCl}_3$ ) of compound **2c**

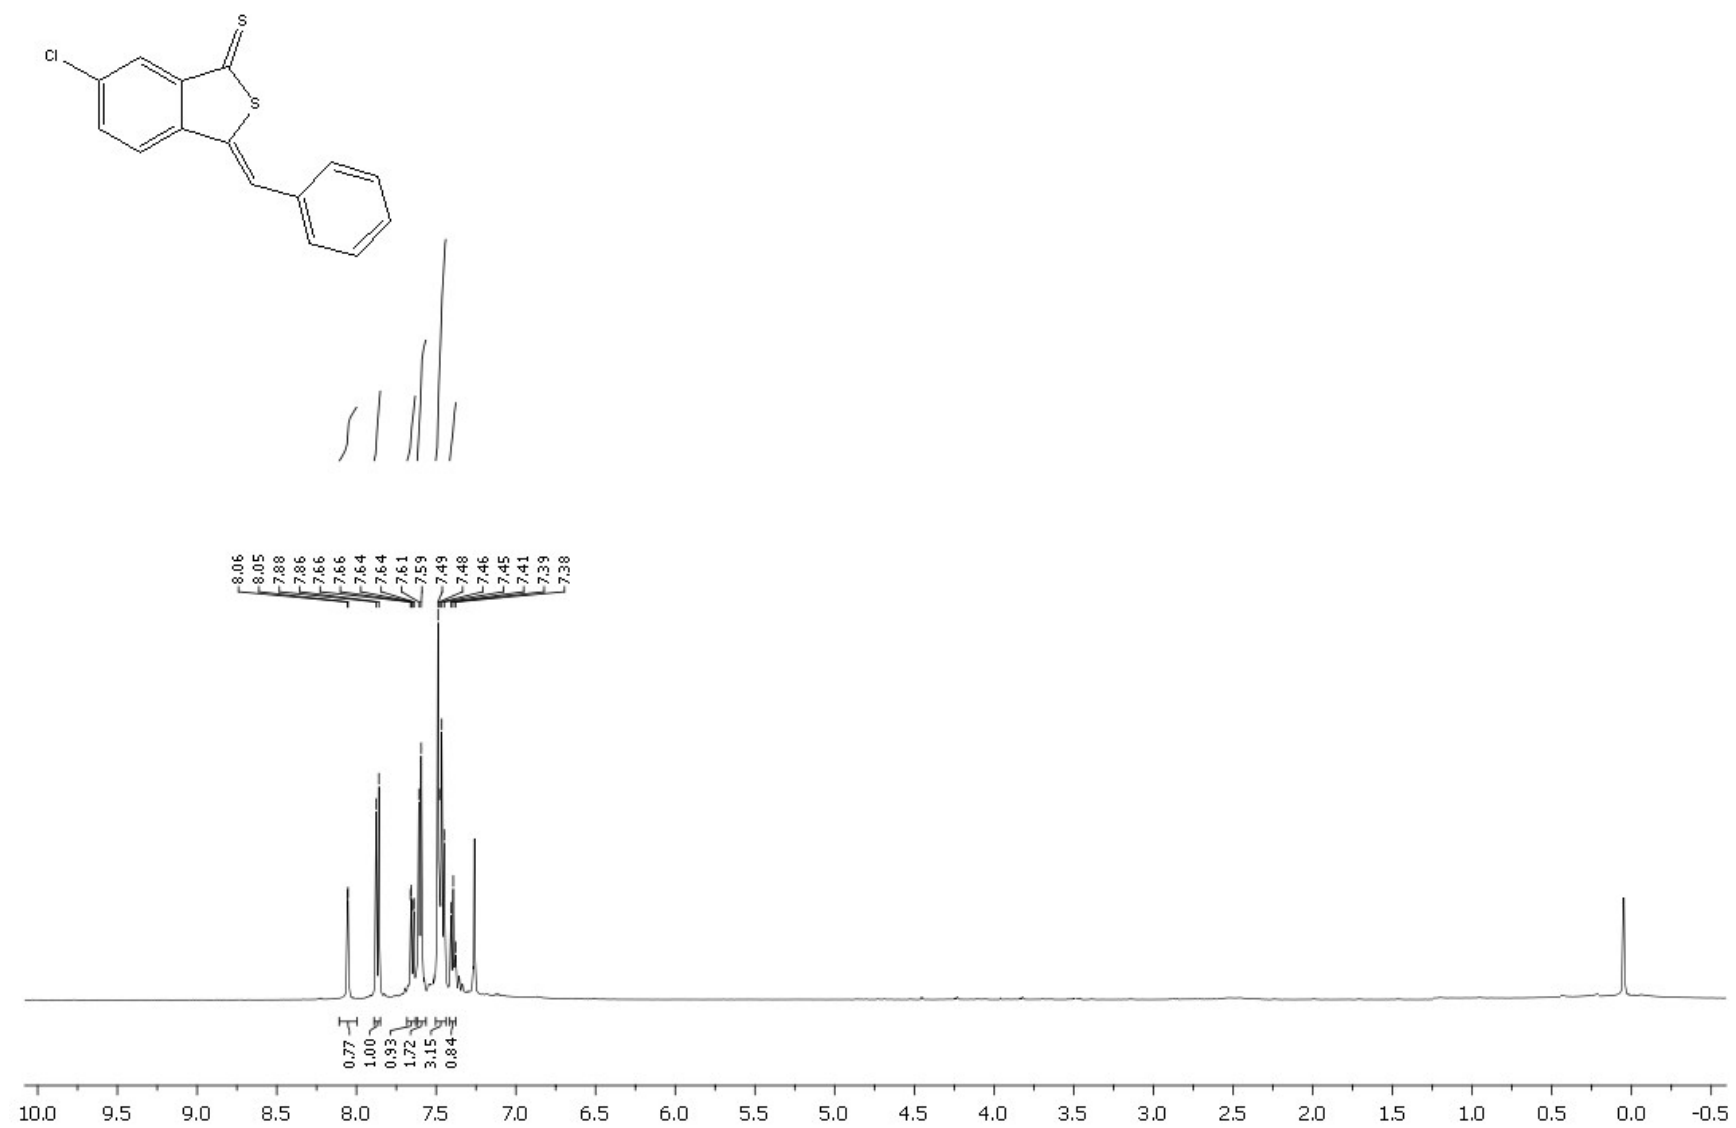



$^{13}\text{C}$  NMR (126 MHz,  $\text{CDCl}_3$ ) of compound **2c**

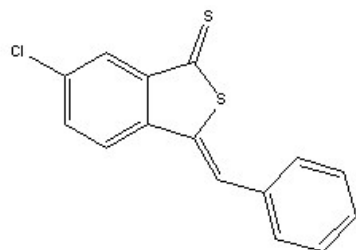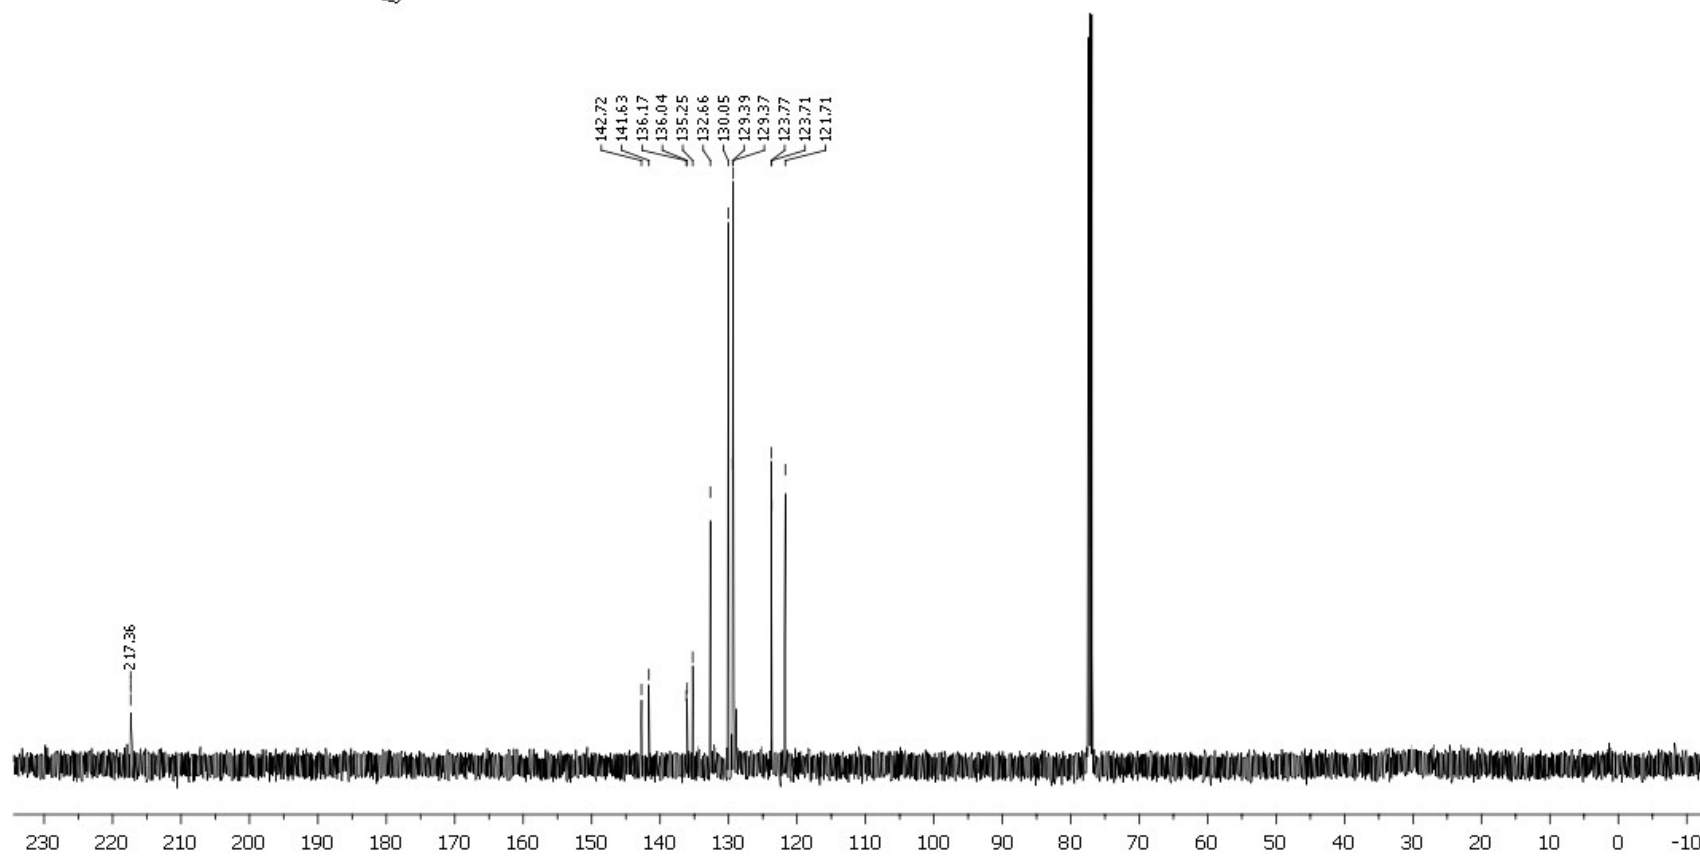

$^1\text{H}$  NMR (500 MHz,  $\text{CDCl}_3$ ) of compound **2d**

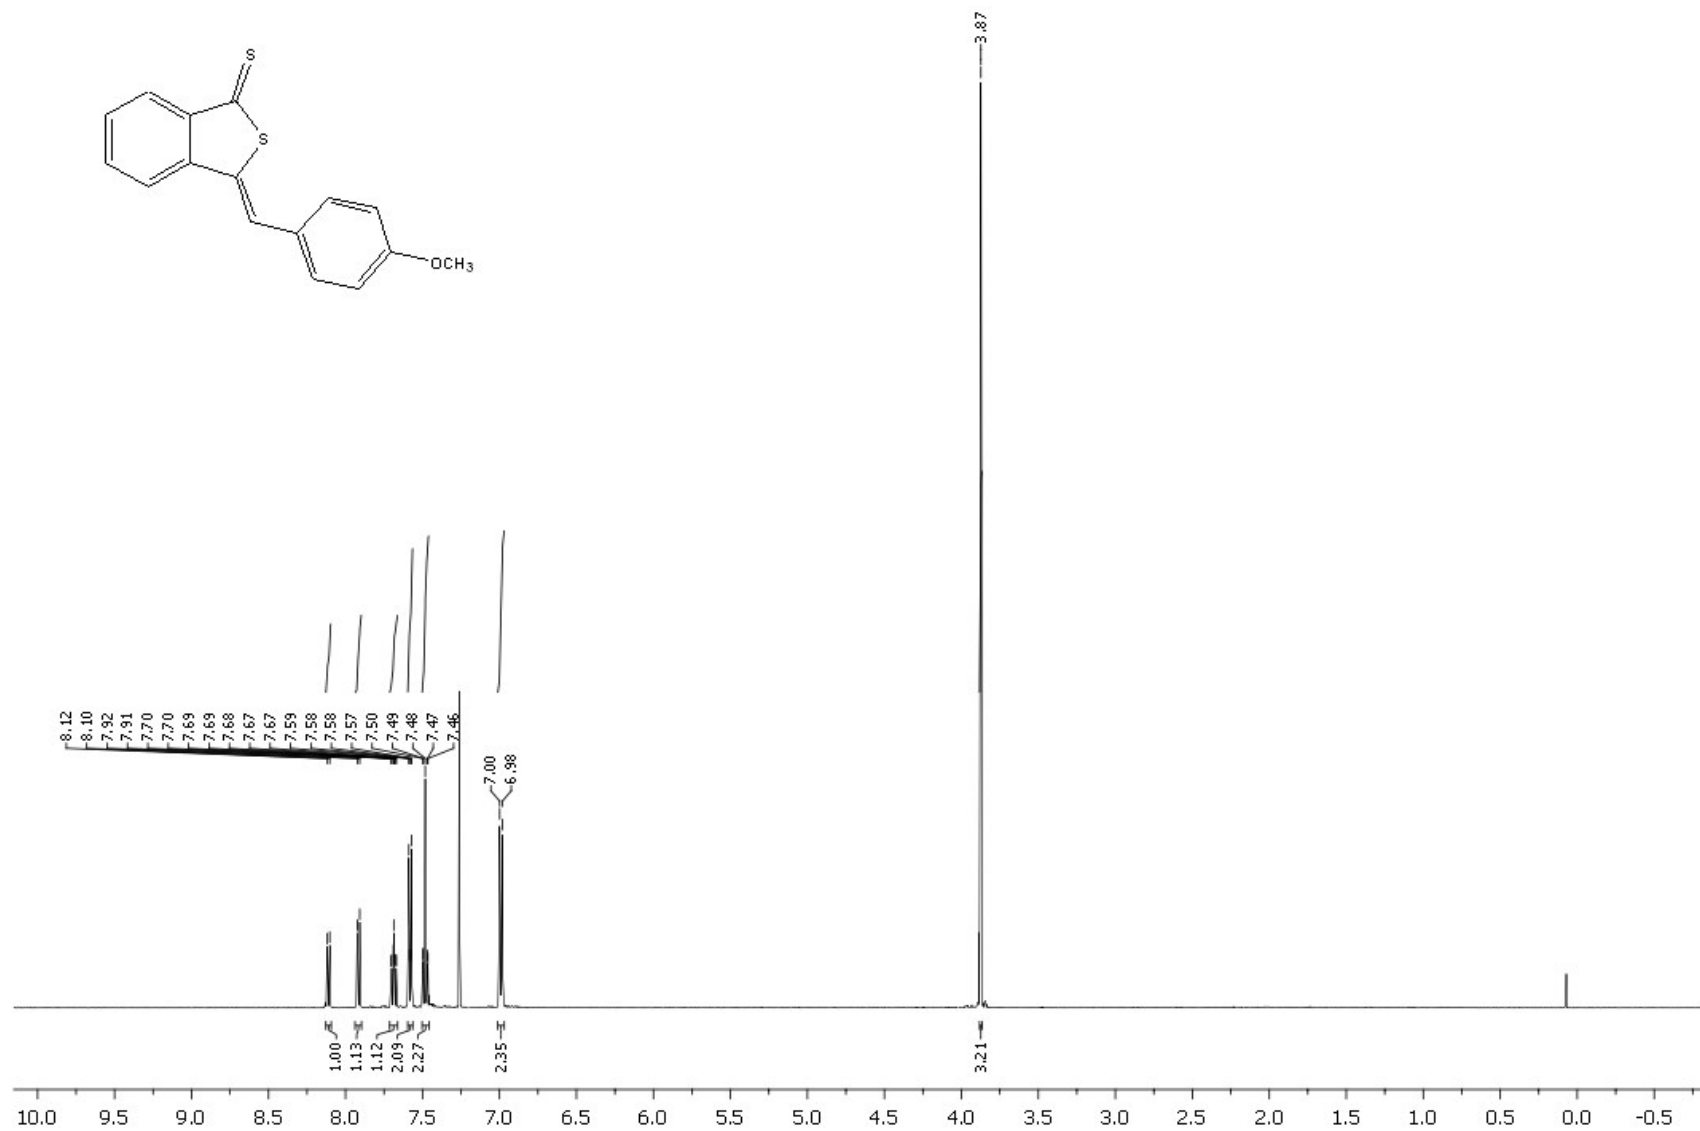

$^{13}\text{C}$  NMR (126 MHz,  $\text{CDCl}_3$ ) of compound **2d**

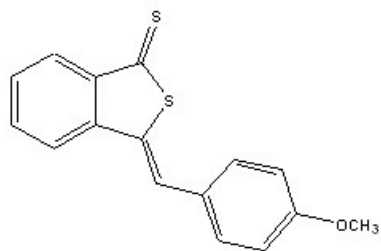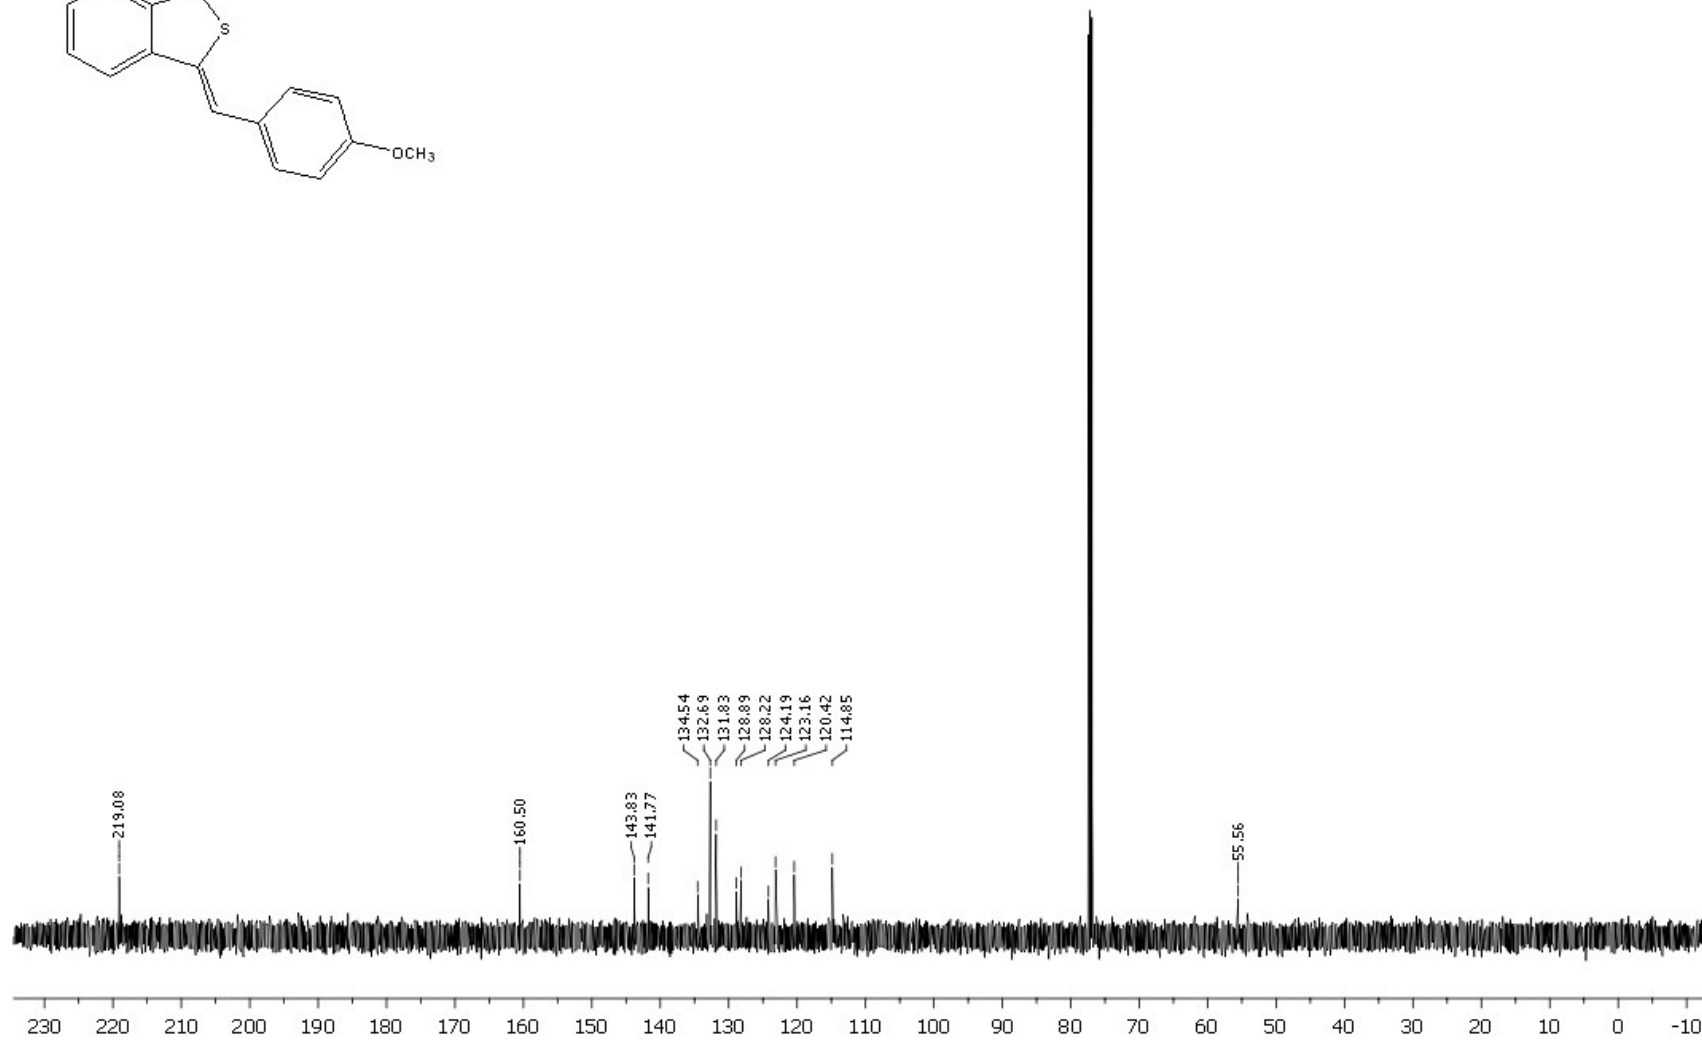

$^1\text{H}$  NMR (500 MHz,  $\text{CDCl}_3$ ) of compound **2e**

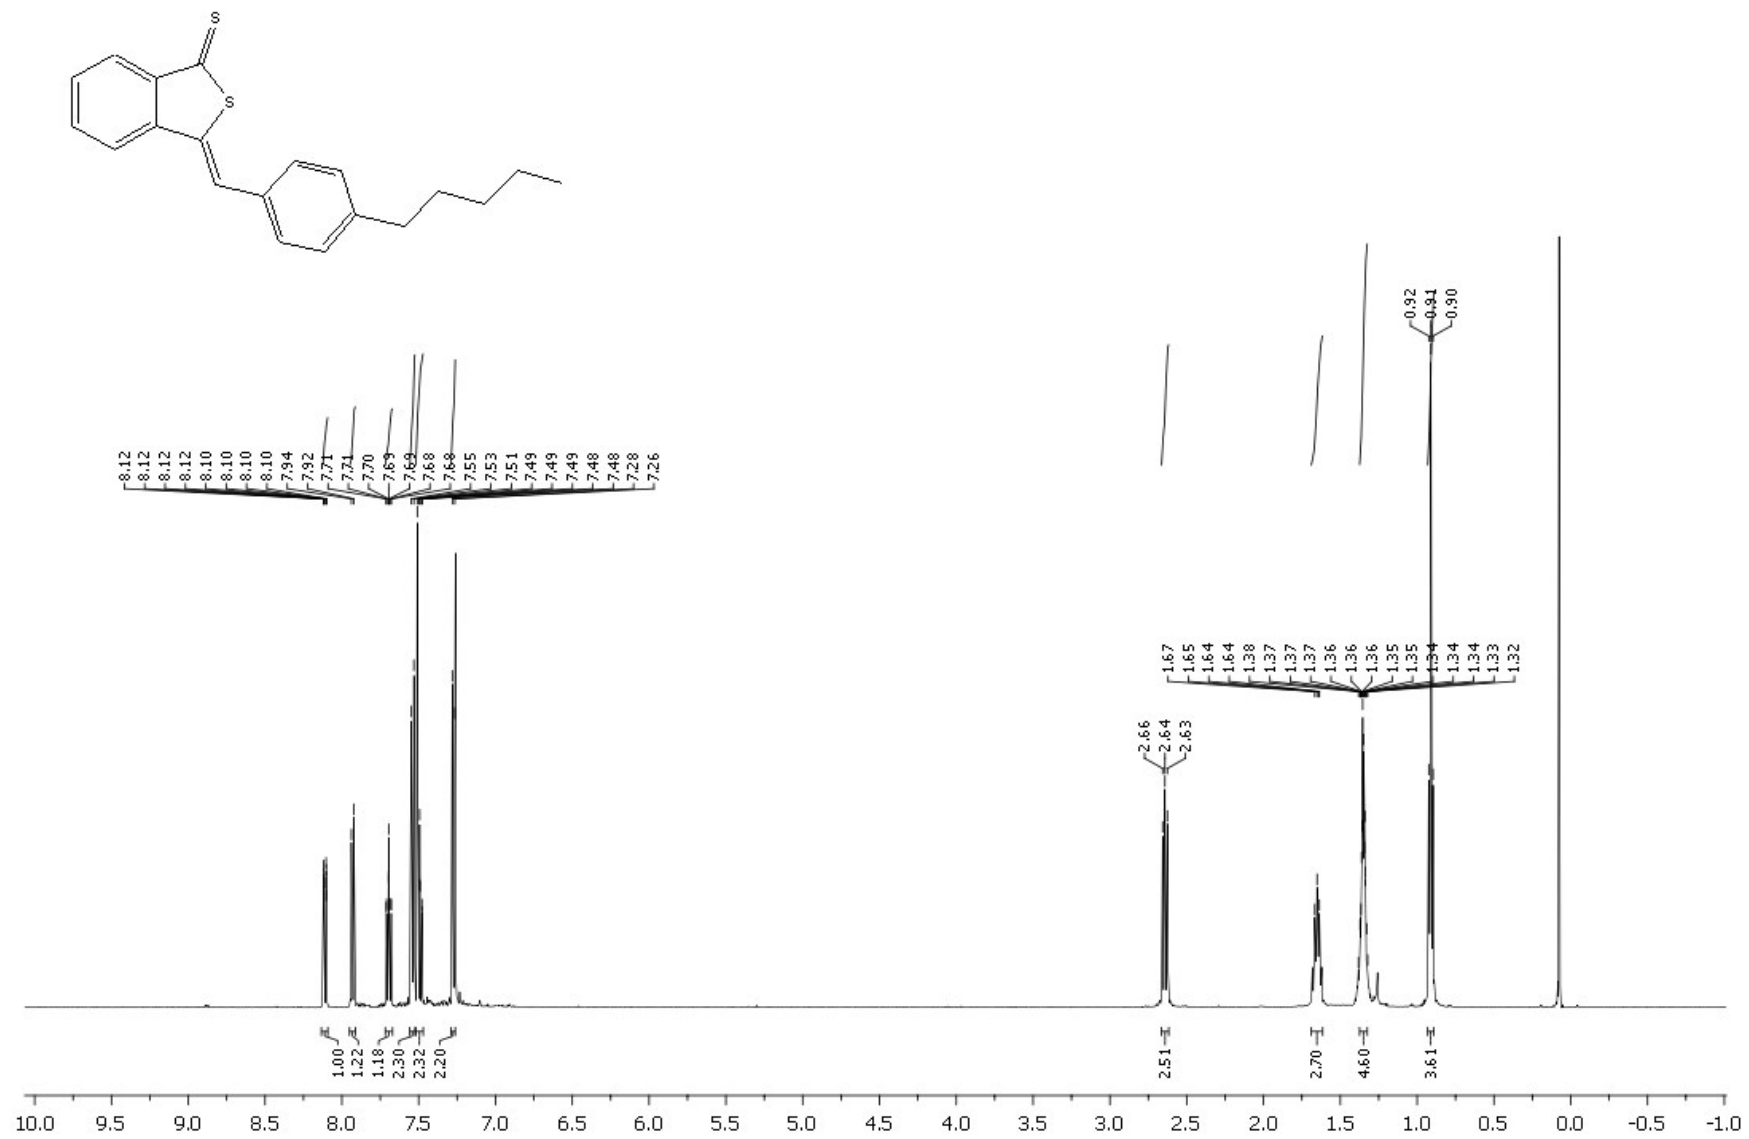

$^{13}\text{C}$  NMR (126 MHz,  $\text{CDCl}_3$ ) of compound **2e**

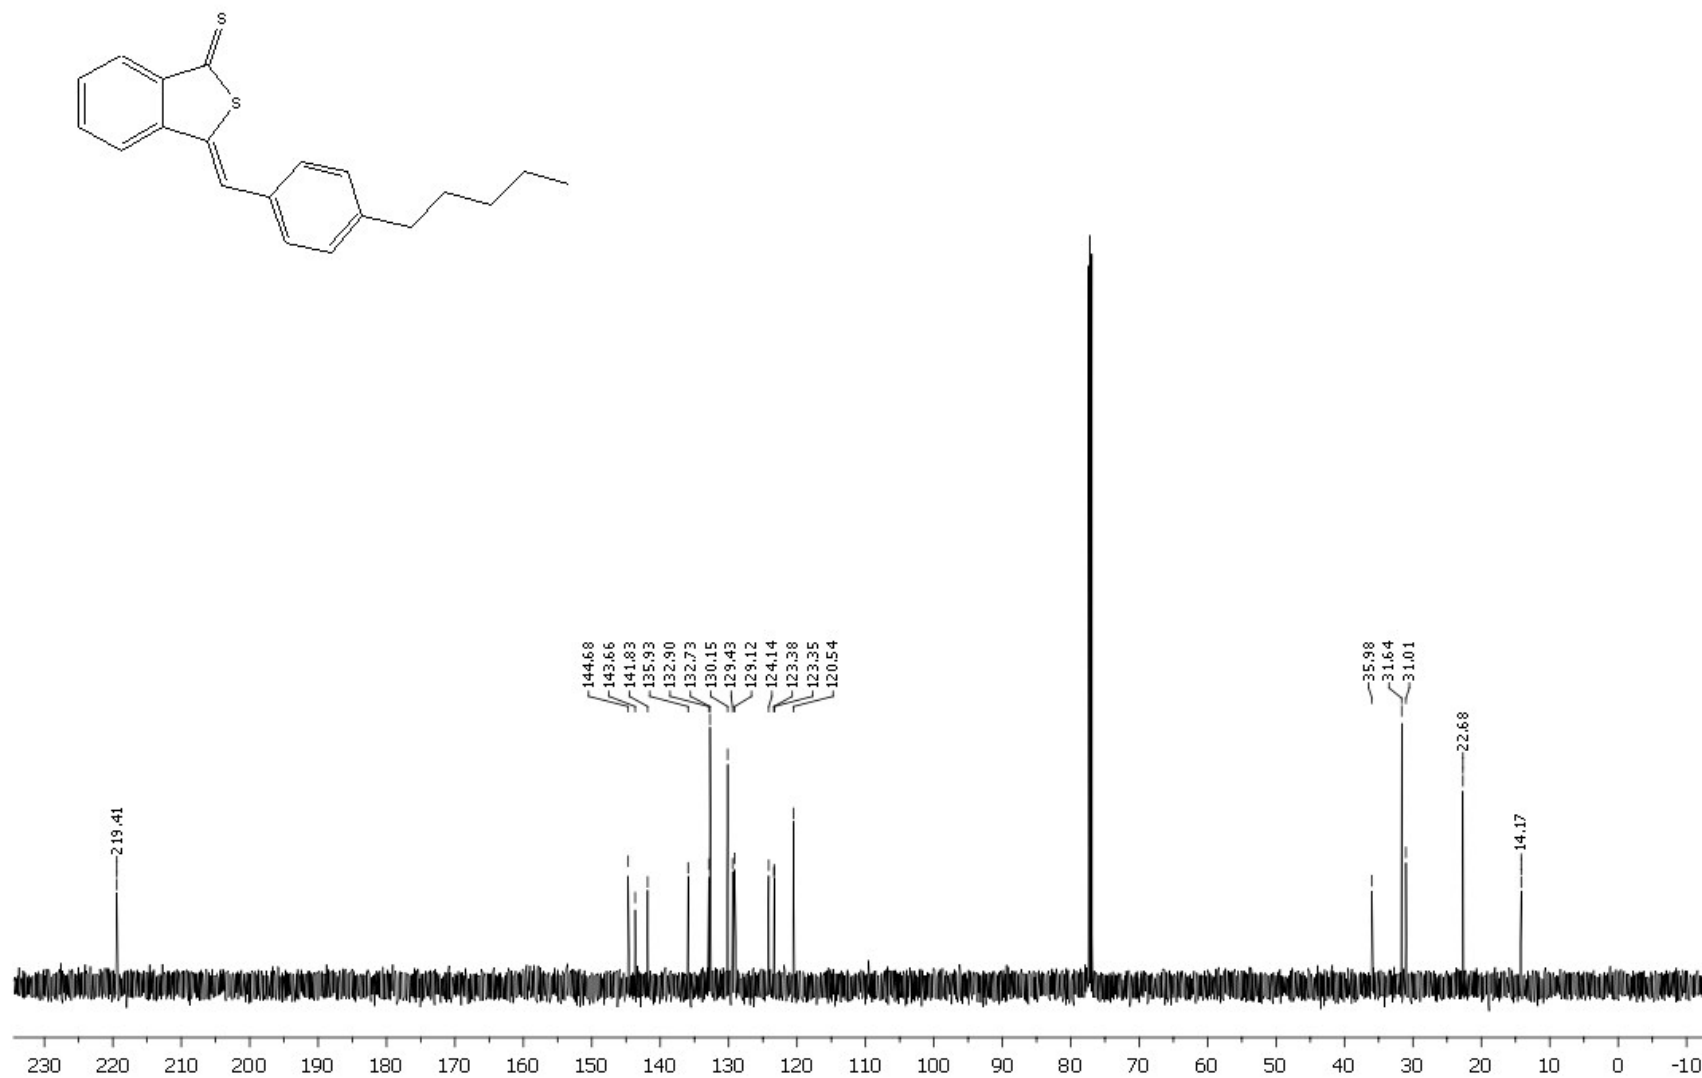

$^1\text{H}$  NMR (500 MHz,  $\text{CDCl}_3$ ) of compound **2f**

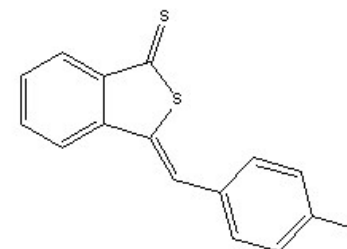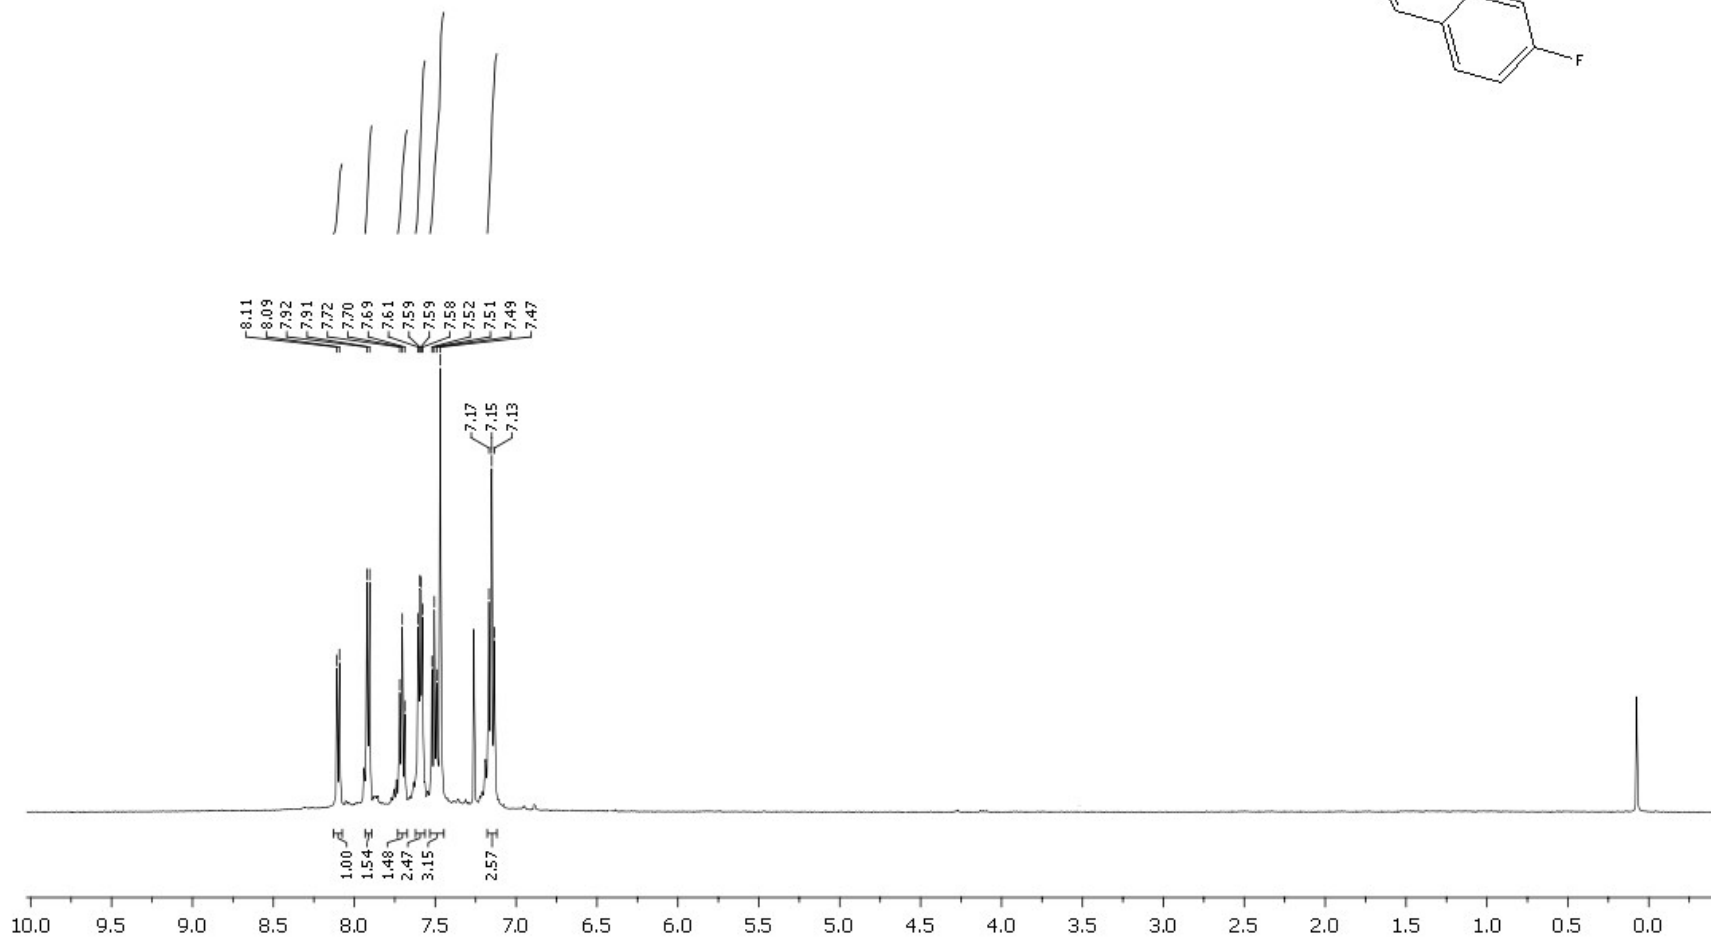

$^{13}\text{C}$  NMR (126 MHz,  $\text{CDCl}_3$ ) of compound **2f**

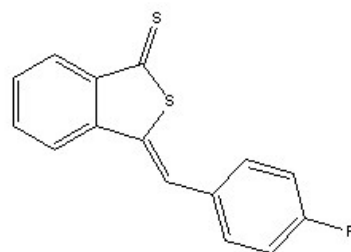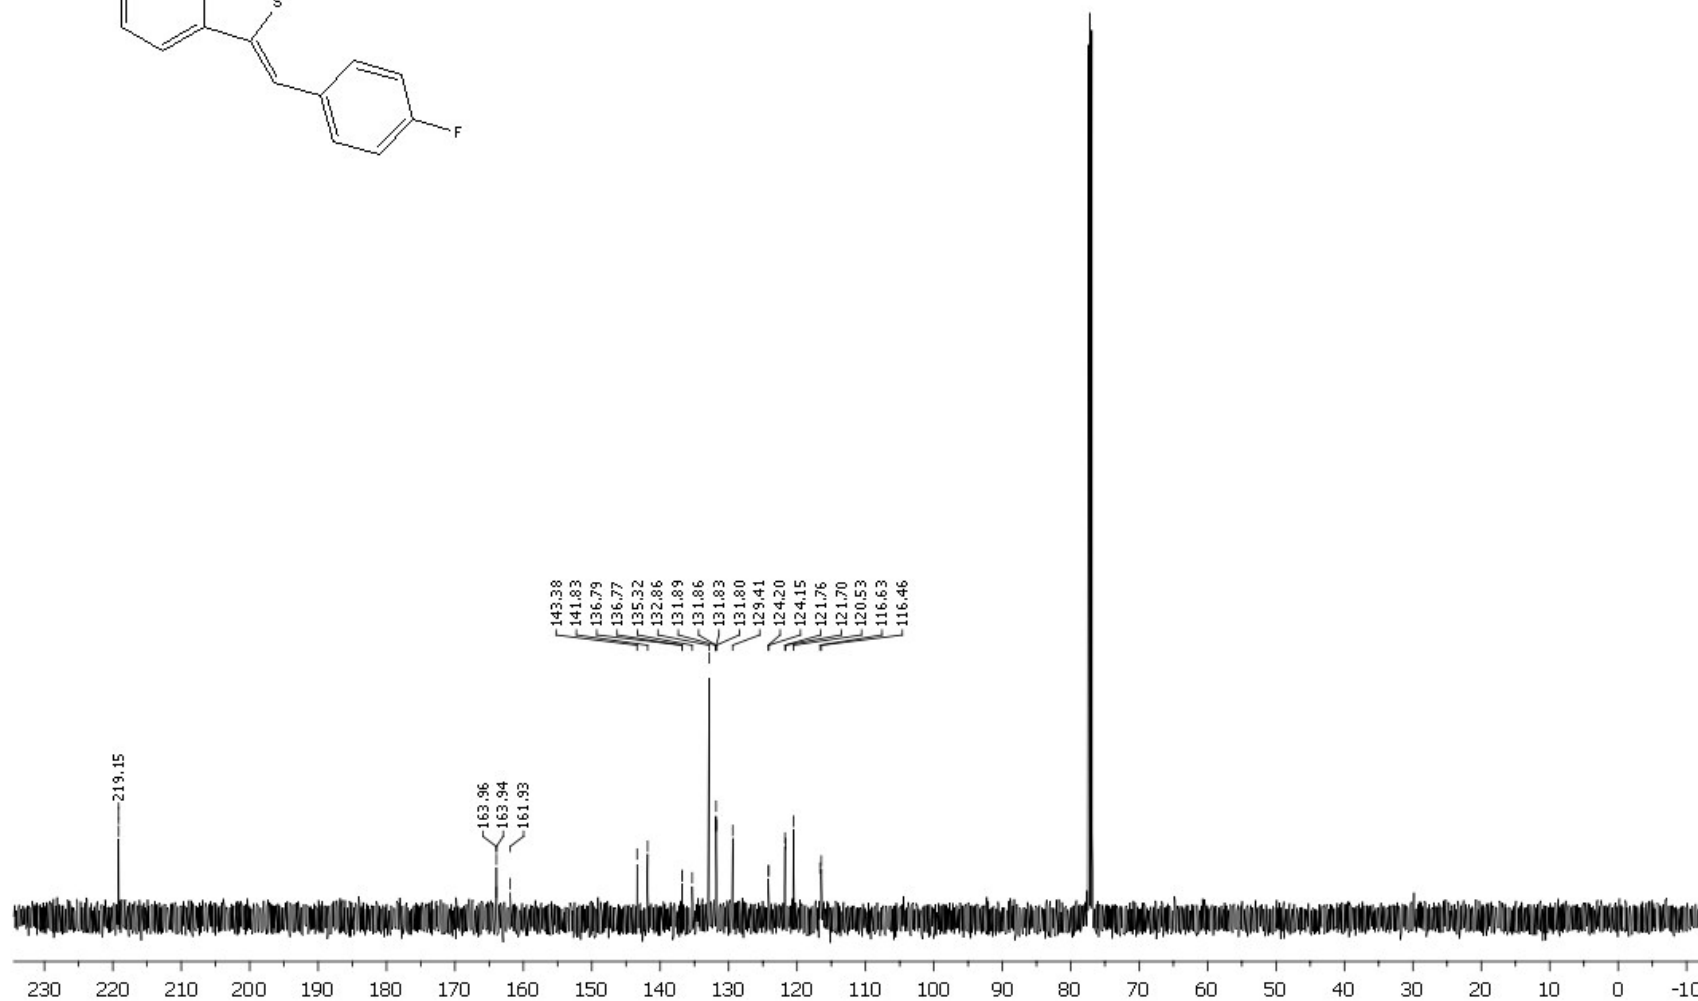

$^1\text{H}$  NMR (500 MHz,  $\text{CDCl}_3$ ) of compound **3d**

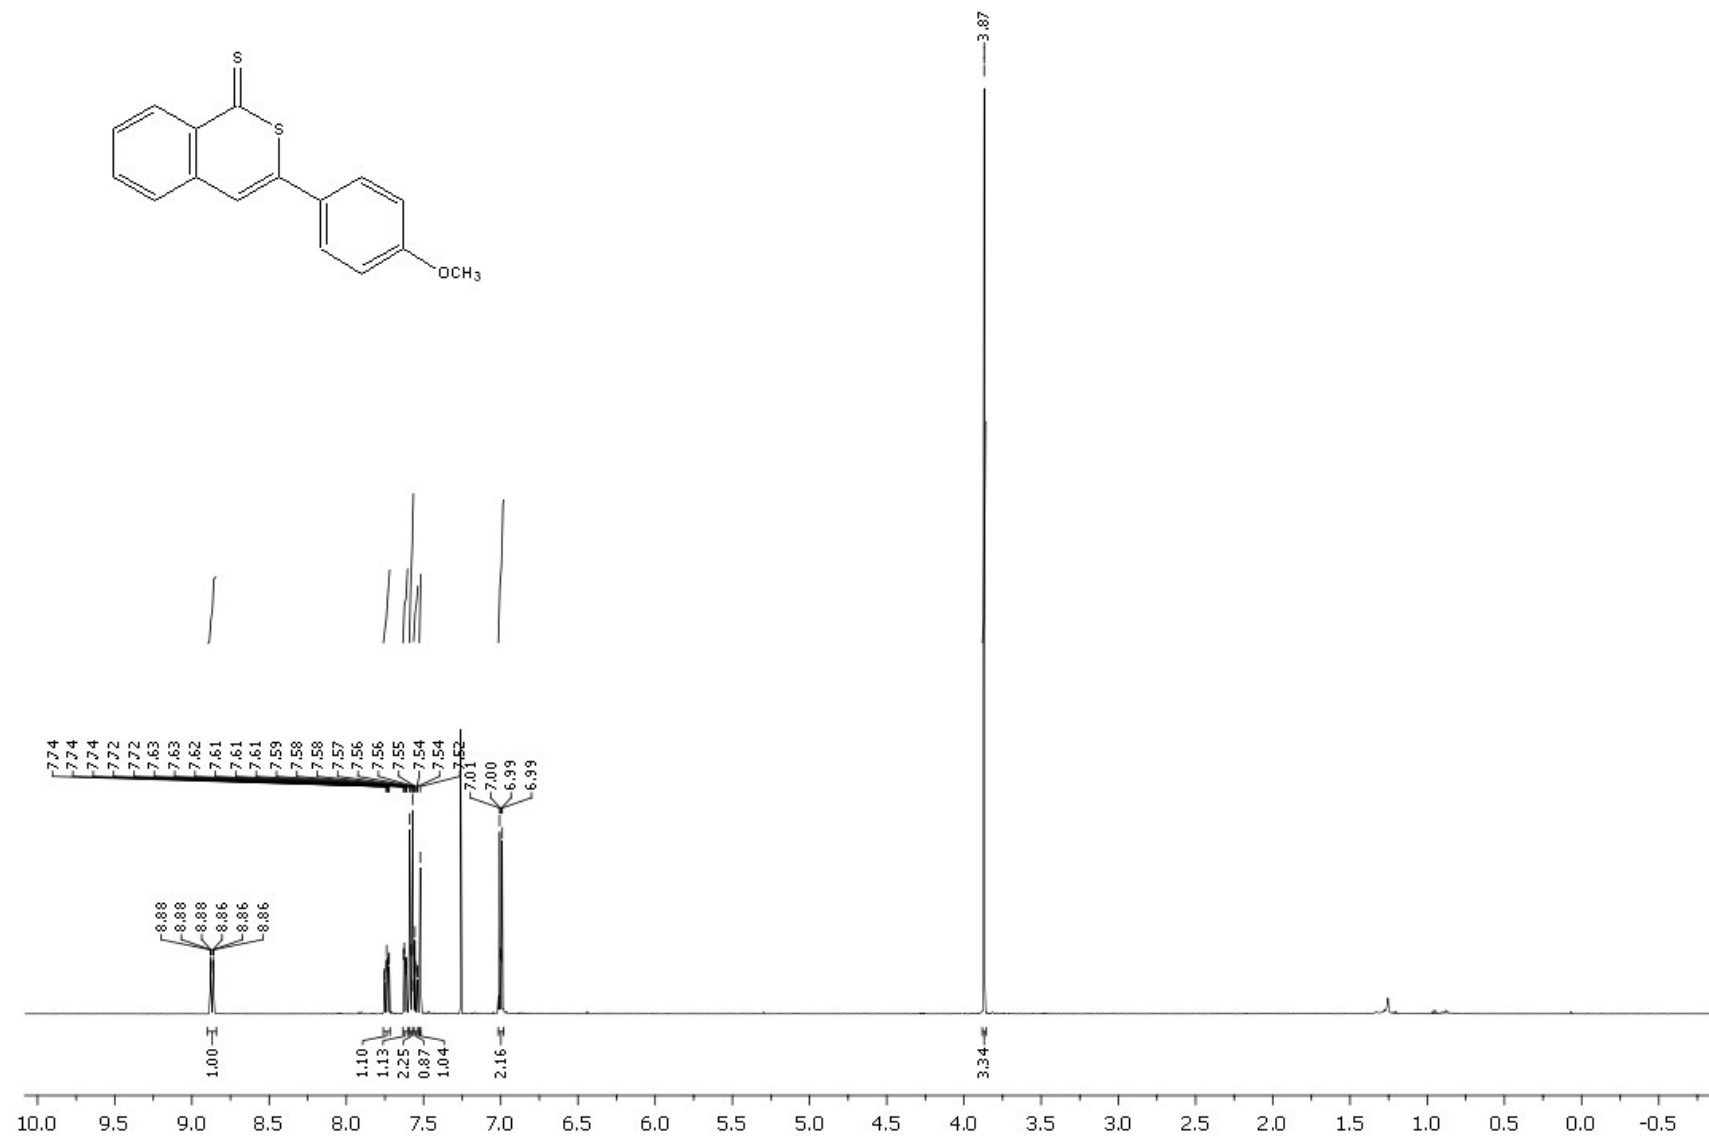



$^{13}\text{C}$  NMR (126 MHz,  $\text{CDCl}_3$ ) of compound **3d**

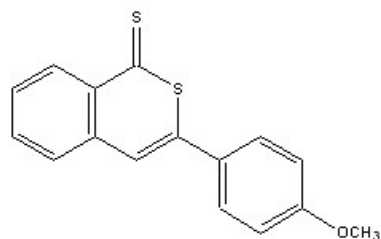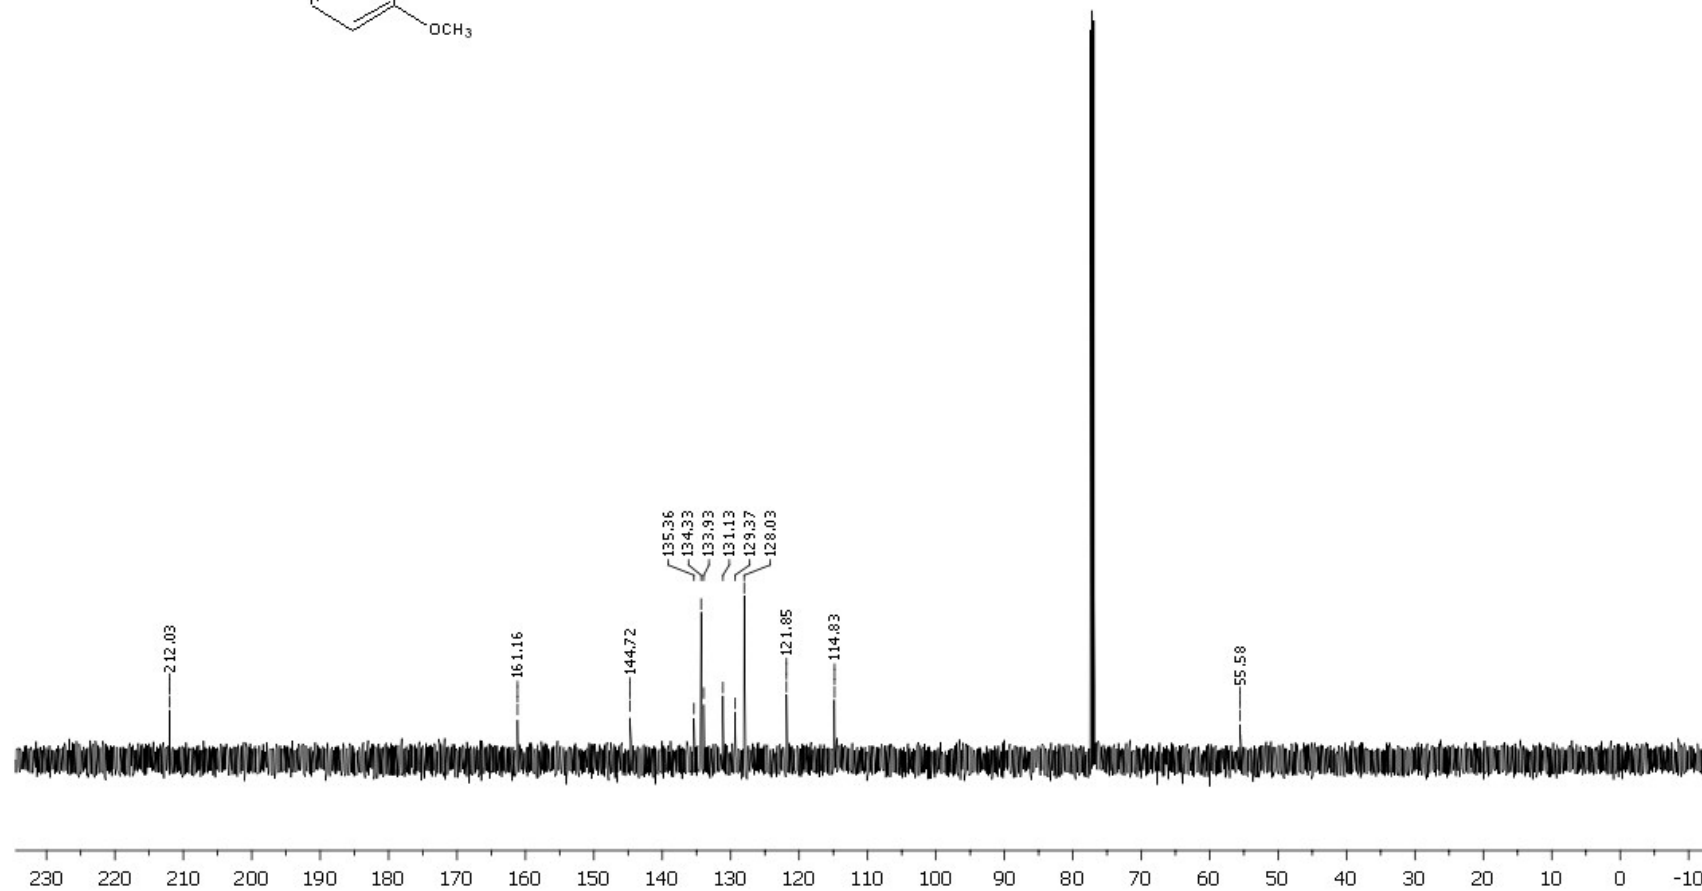

$^1\text{H}$  NMR (500 MHz,  $\text{CDCl}_3$ ) of compound **3e**

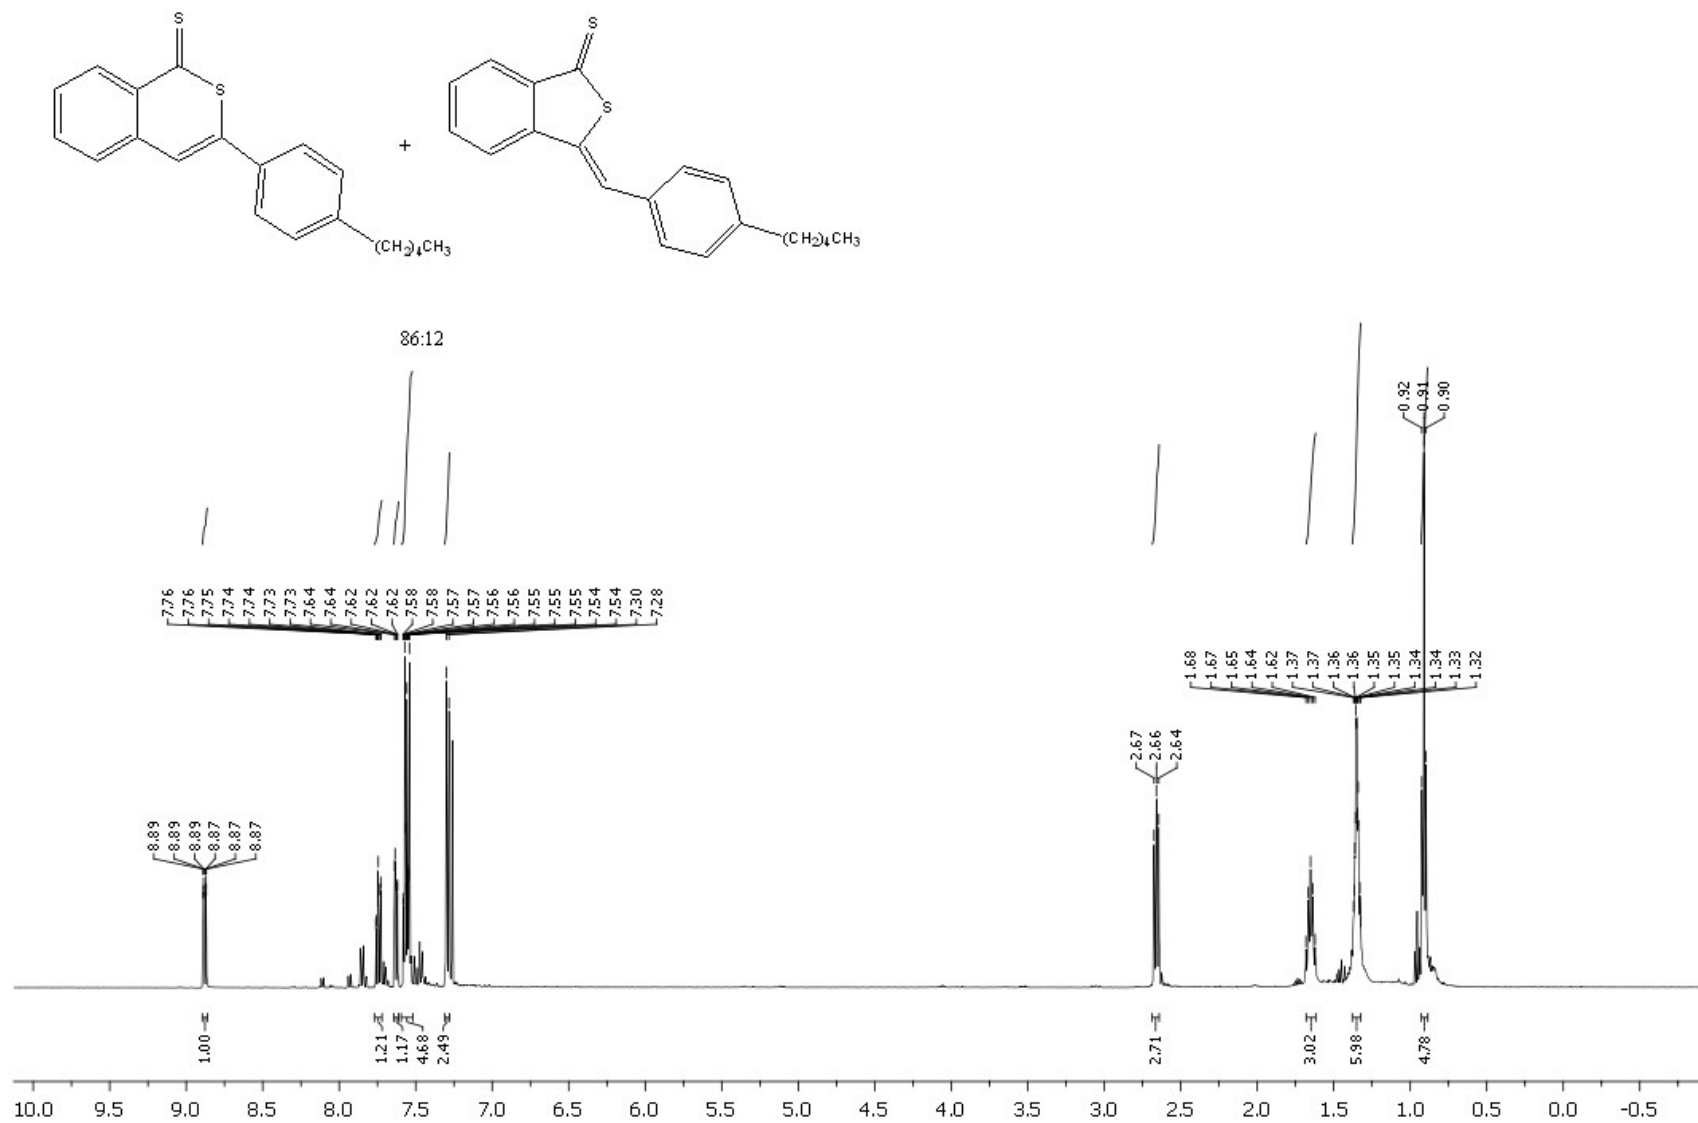

$^{13}\text{C}$  NMR (126 MHz,  $\text{CDCl}_3$ ) of compound **3e**

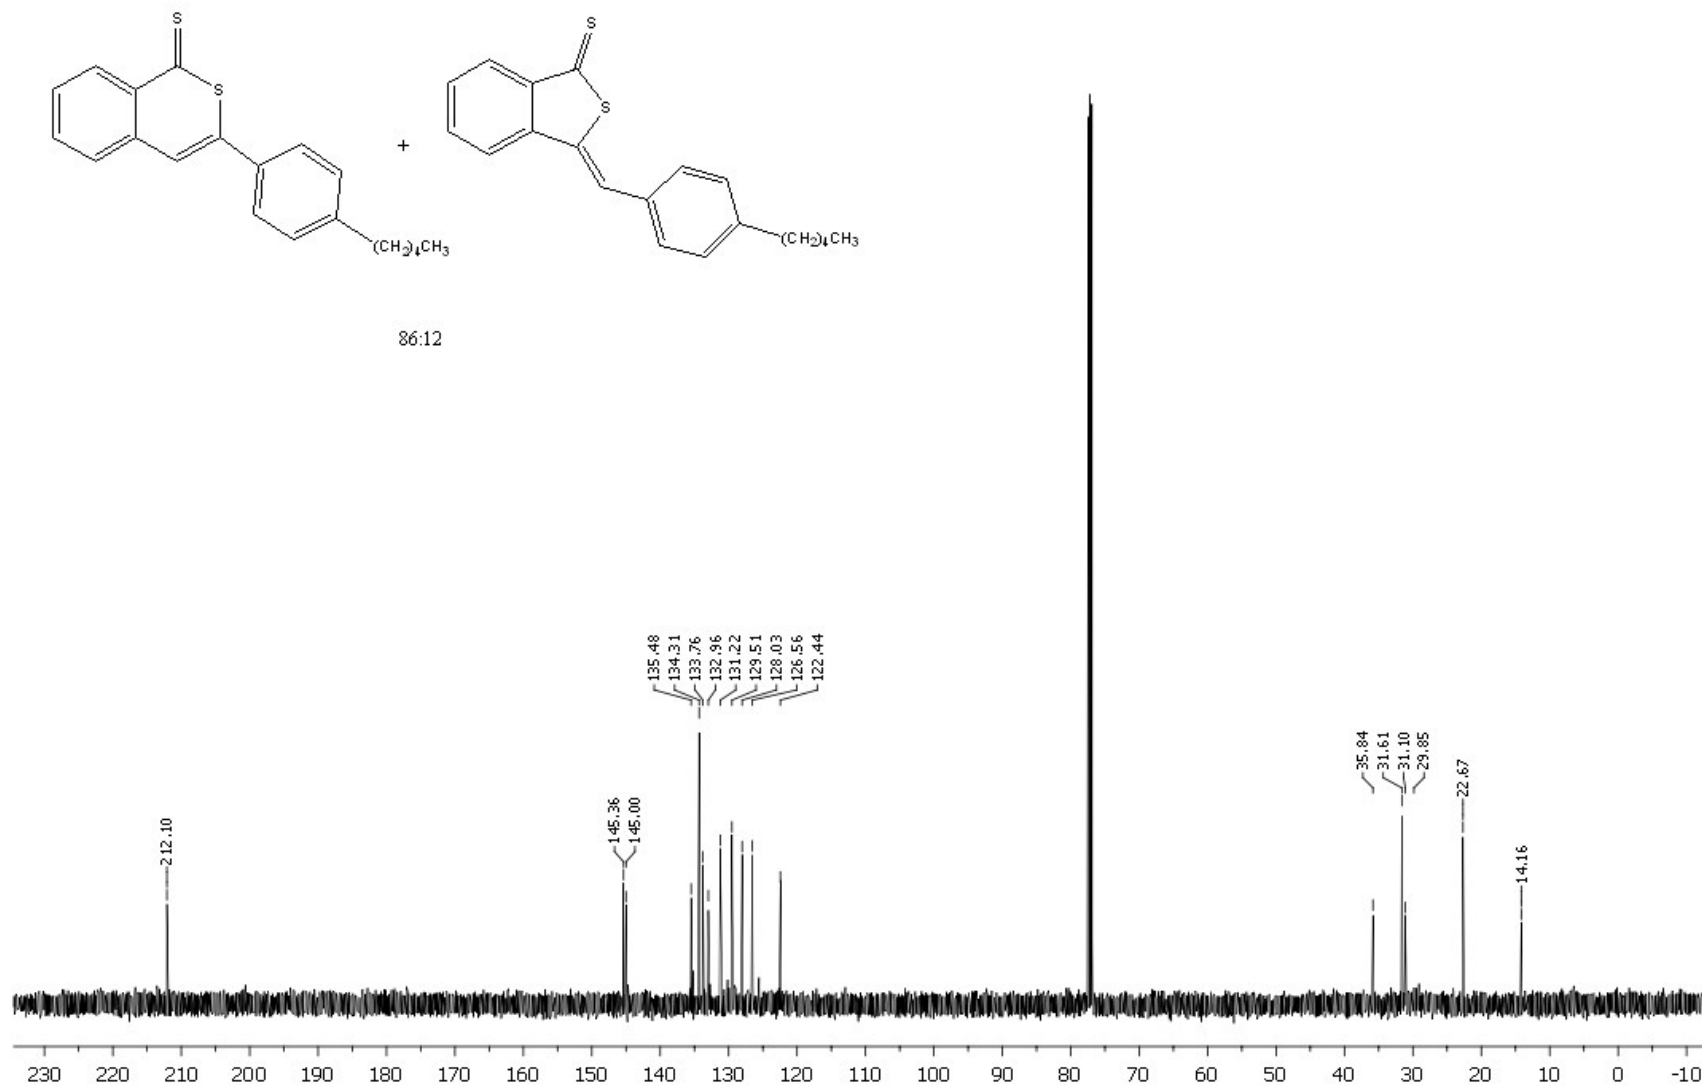

$^1\text{H}$  NMR (500 MHz,  $\text{CDCl}_3$ ) of compound **3g**

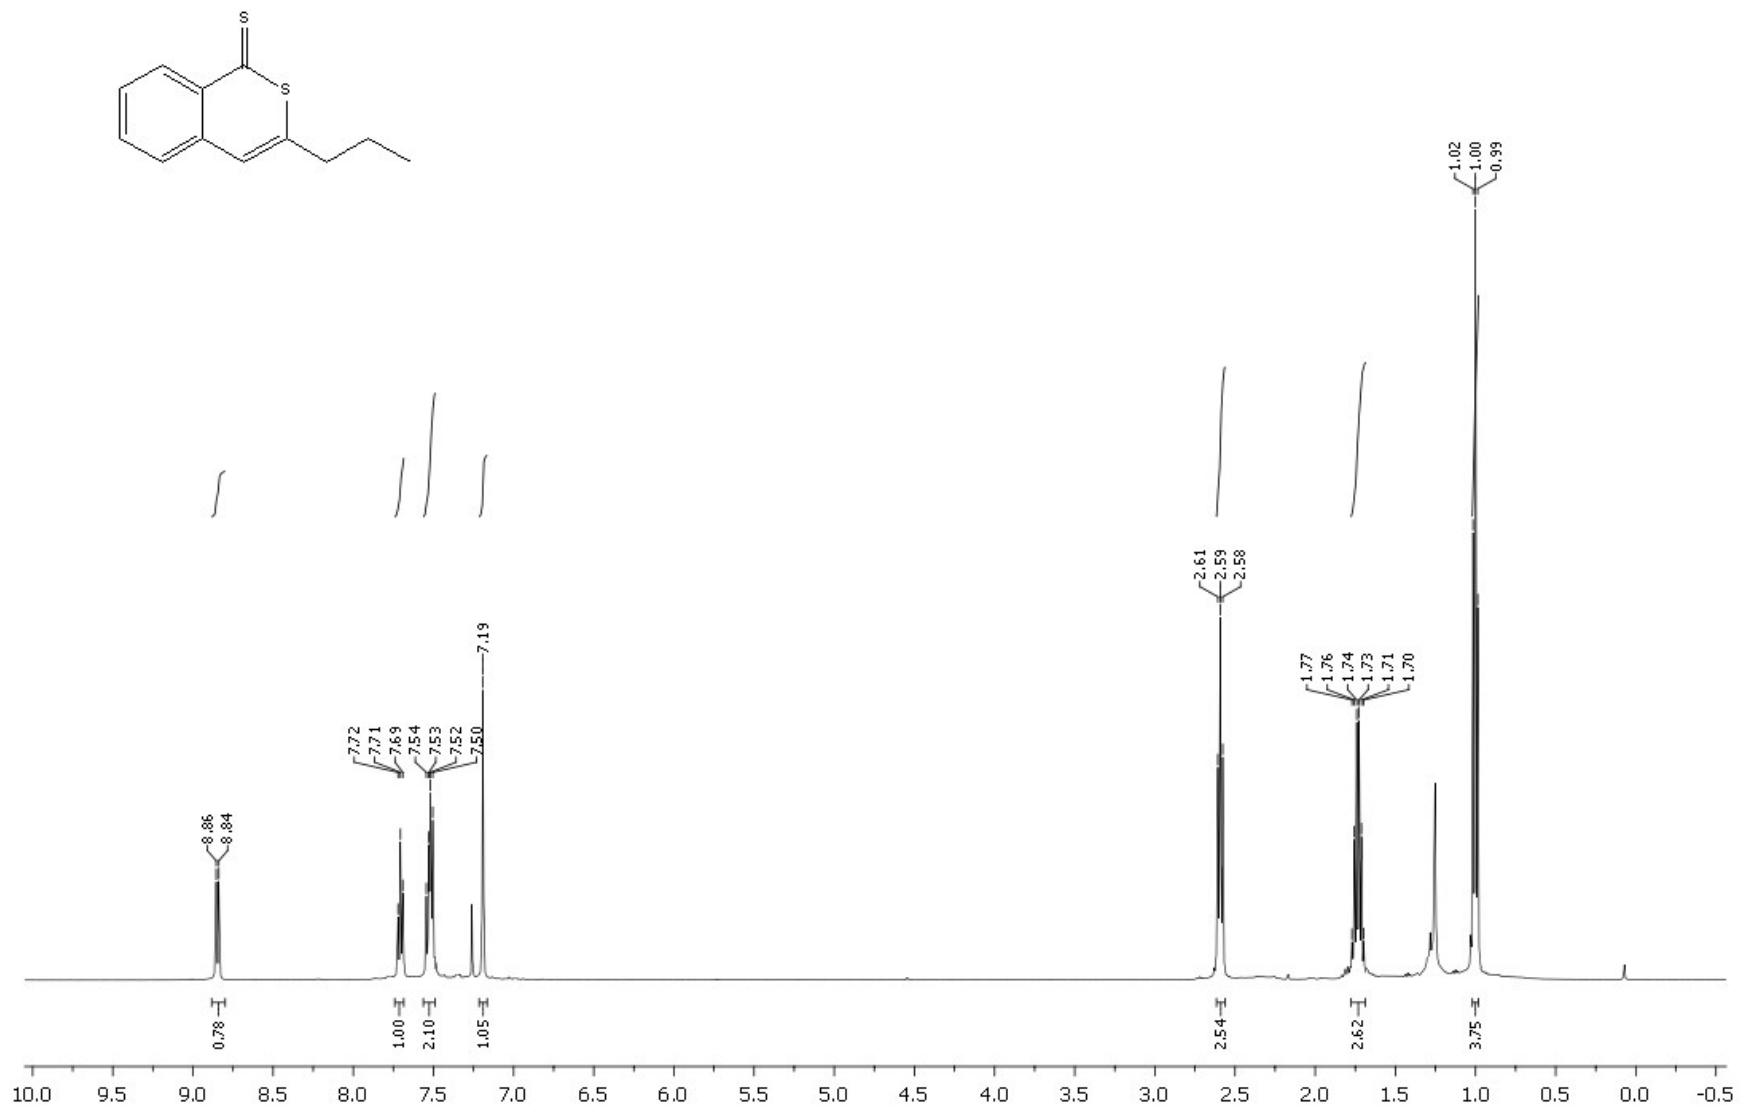

$^{13}\text{C}$  NMR (126 MHz,  $\text{CDCl}_3$ ) of compound **3g**

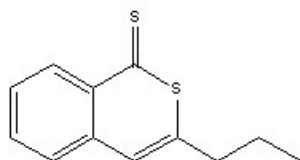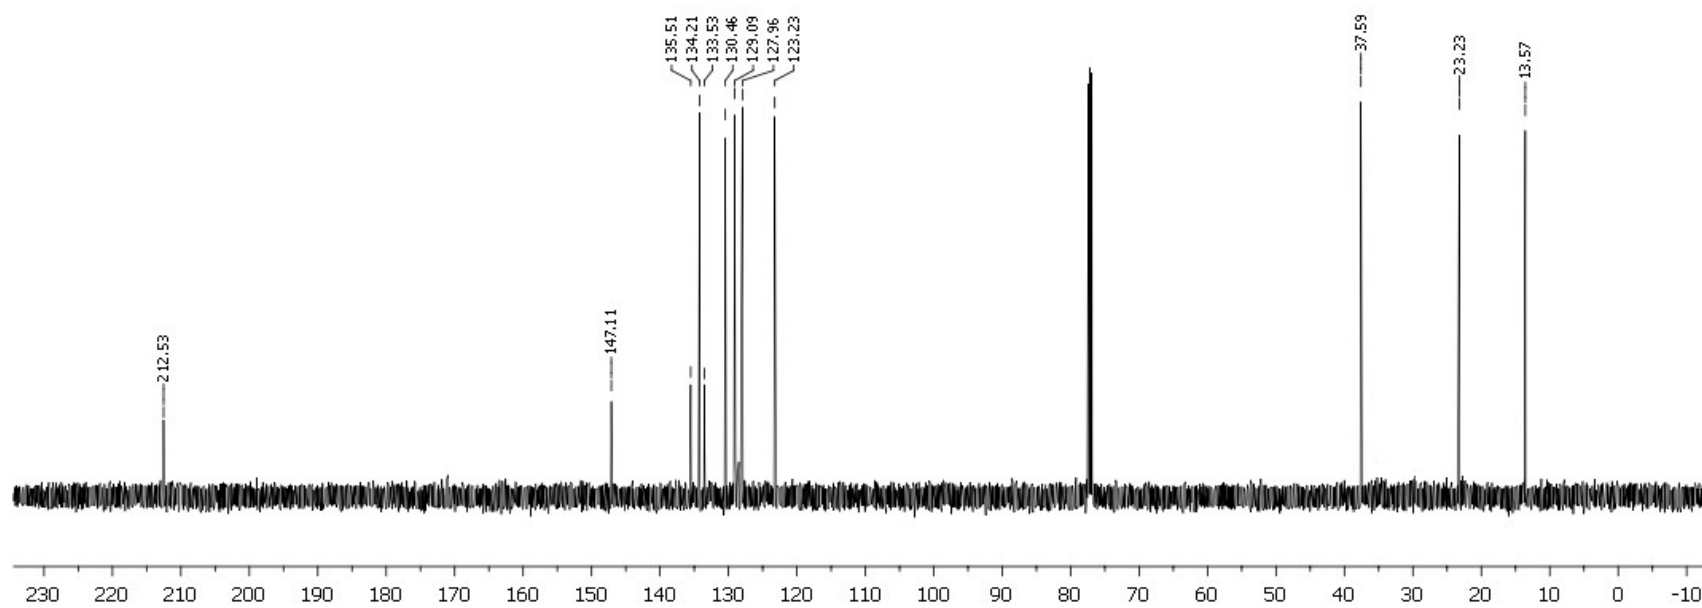

## 1D Selective NOESY spectra for products 2a, 2d, and 3d

### 1D selective NOESY (500 ms) of compound 2a

Selective band center: 7.53 (ppm); width: 10.1 (Hz)

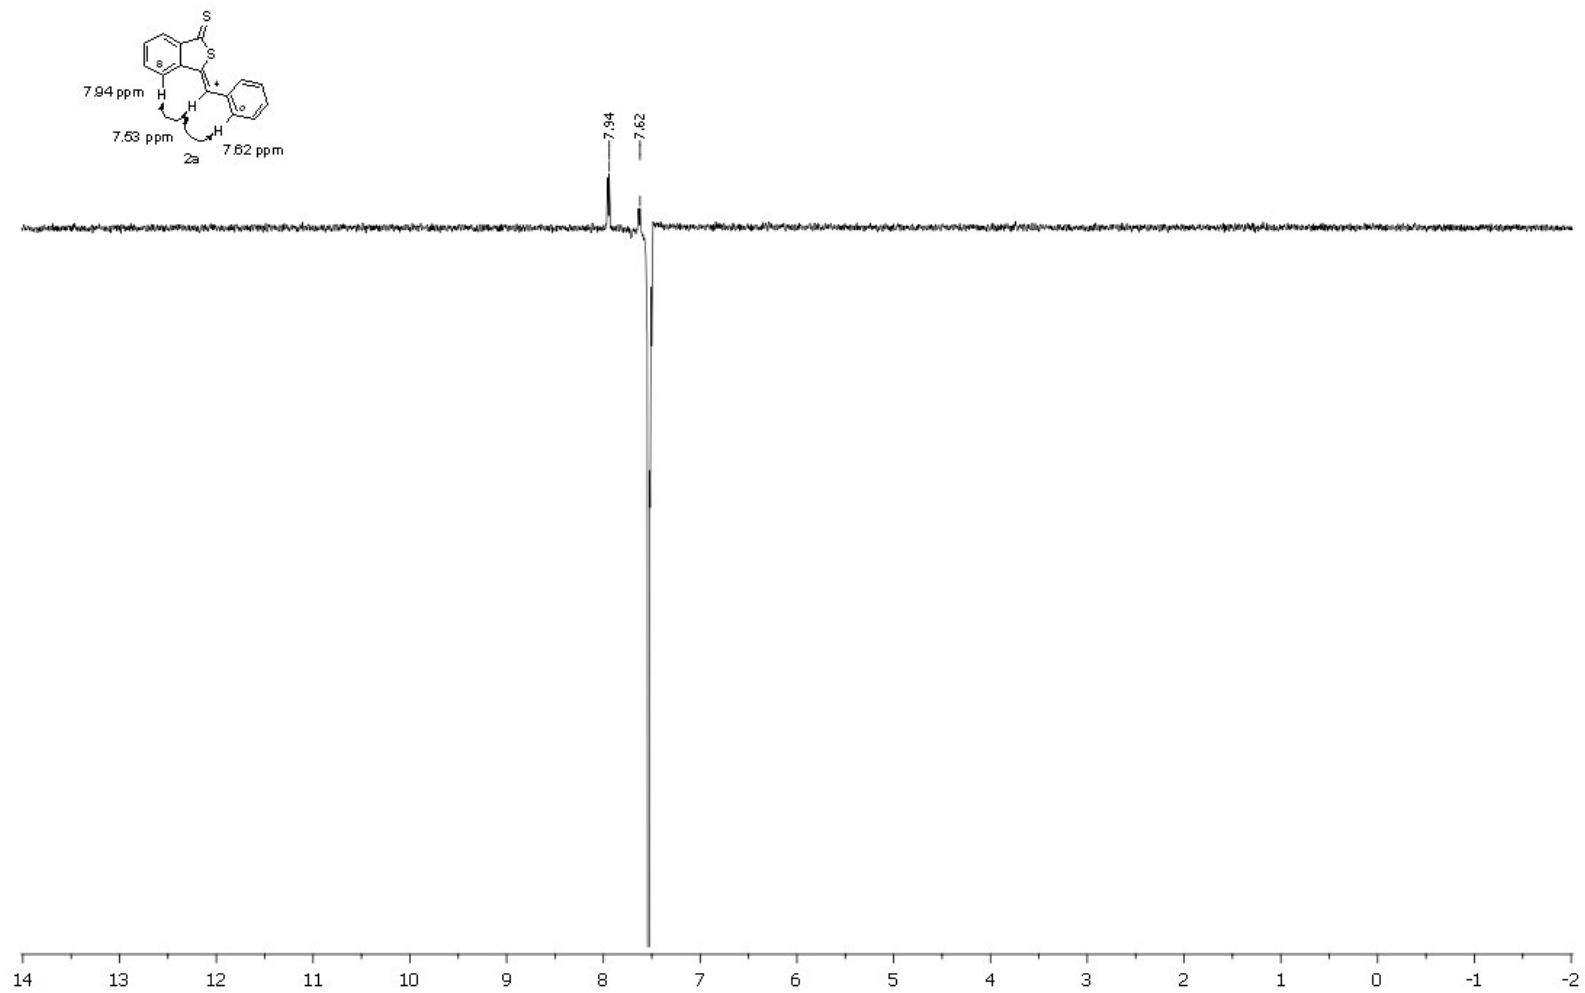

# 1D selective NOESY (500 ms) of compound **2a**

Selective band center: 7.95 (ppm); width: 17.7 (Hz)

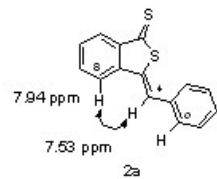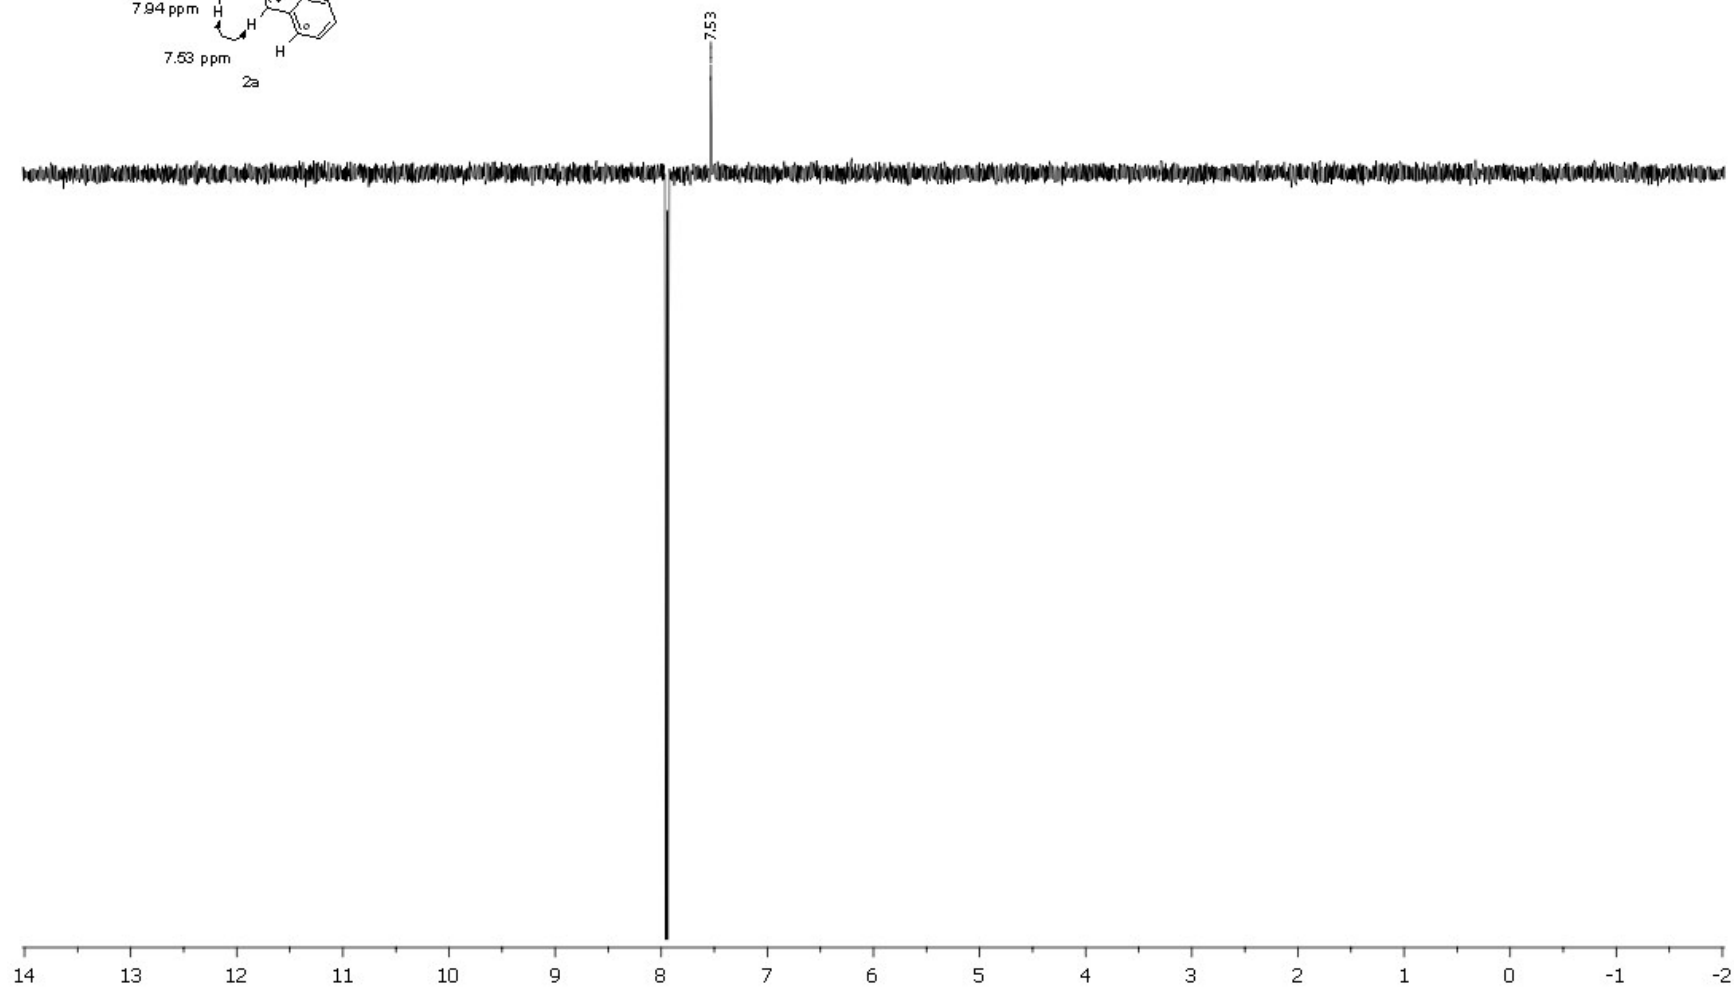

# 1D selective NOESY (500 ms) of compound **2d**

Selective band center: 7.91 (ppm); width: 42.1 (Hz)

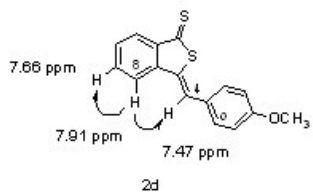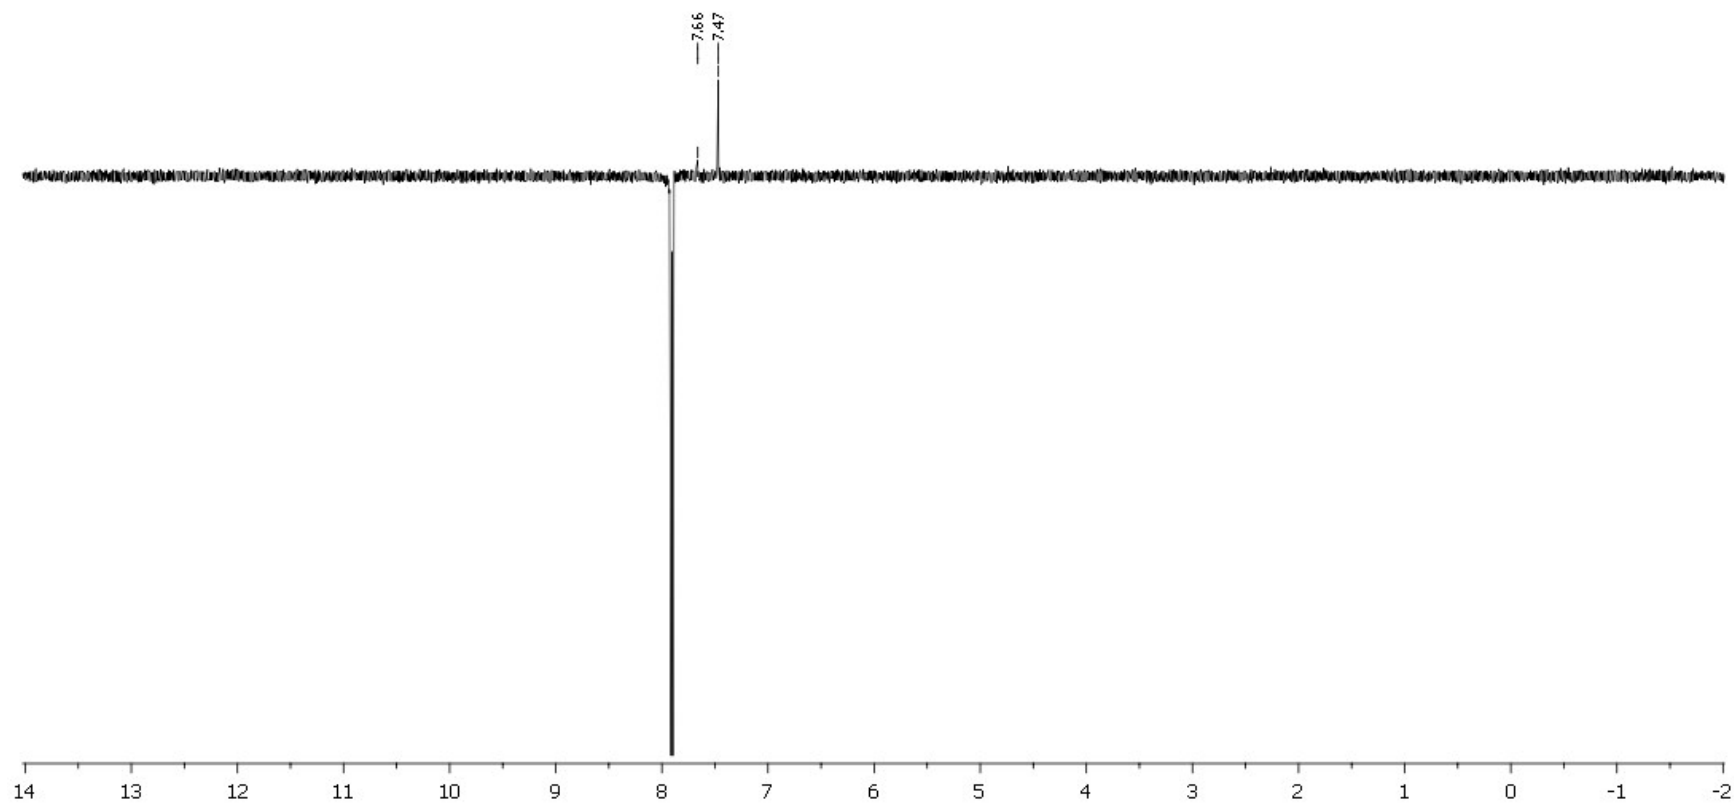



# 1D selective NOESY (500 ms) of compound **2d**

Selective band center: 7.47 (ppm); width: 42.1 (Hz)

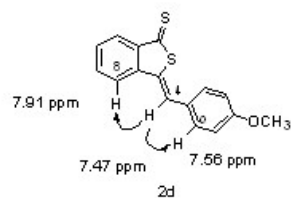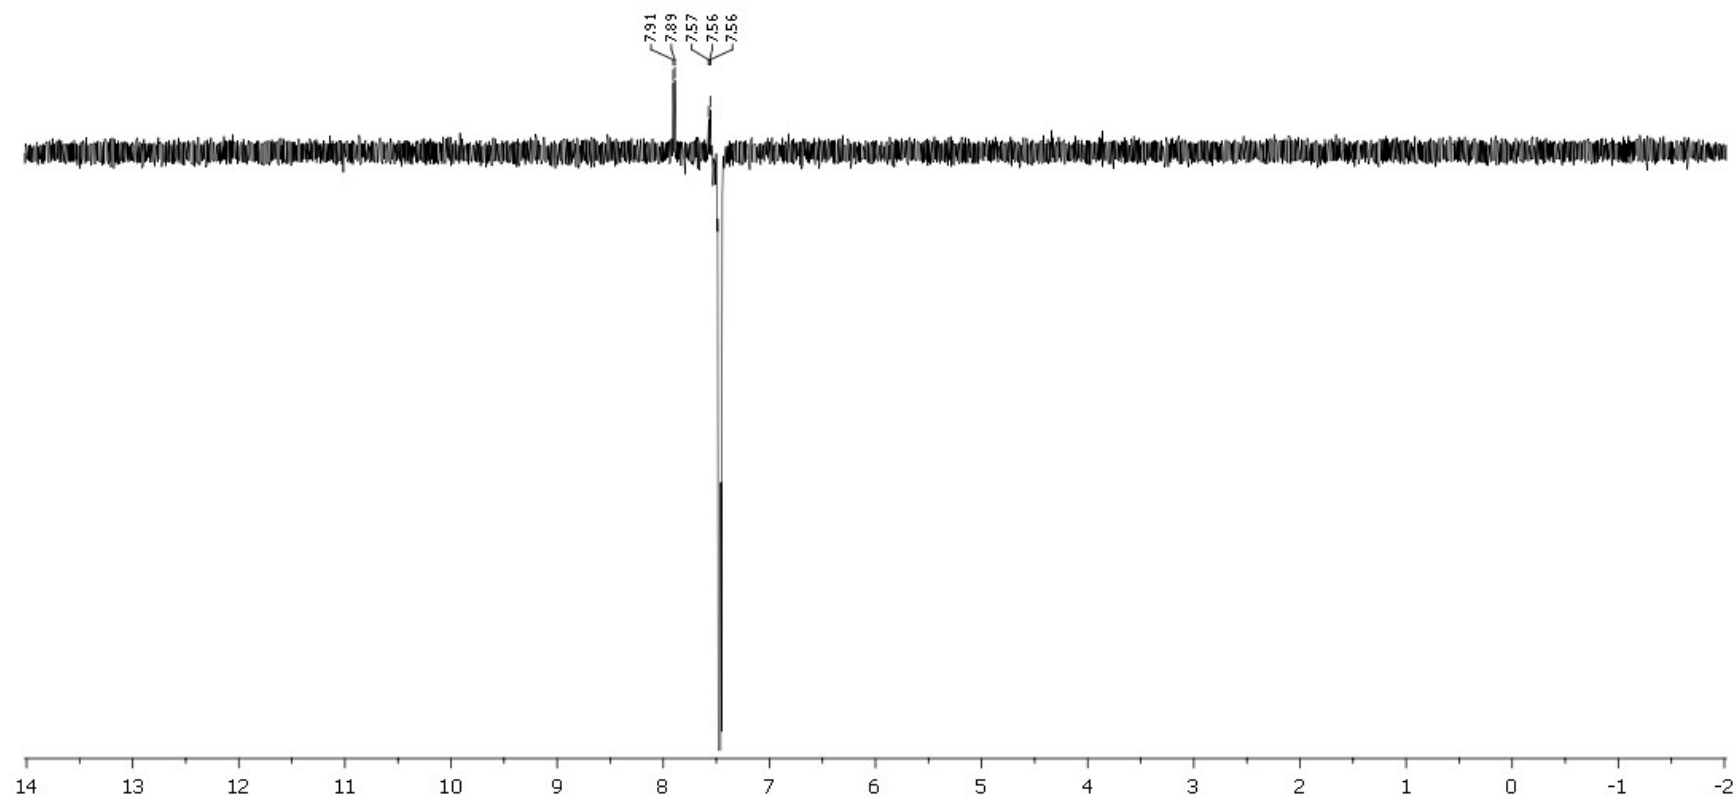

# 1D selective NOESY of compound **3d**

Selective band center: 7.52 (ppm); width: 9.8 (Hz)

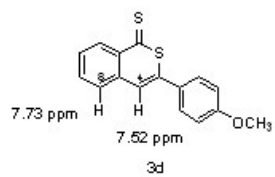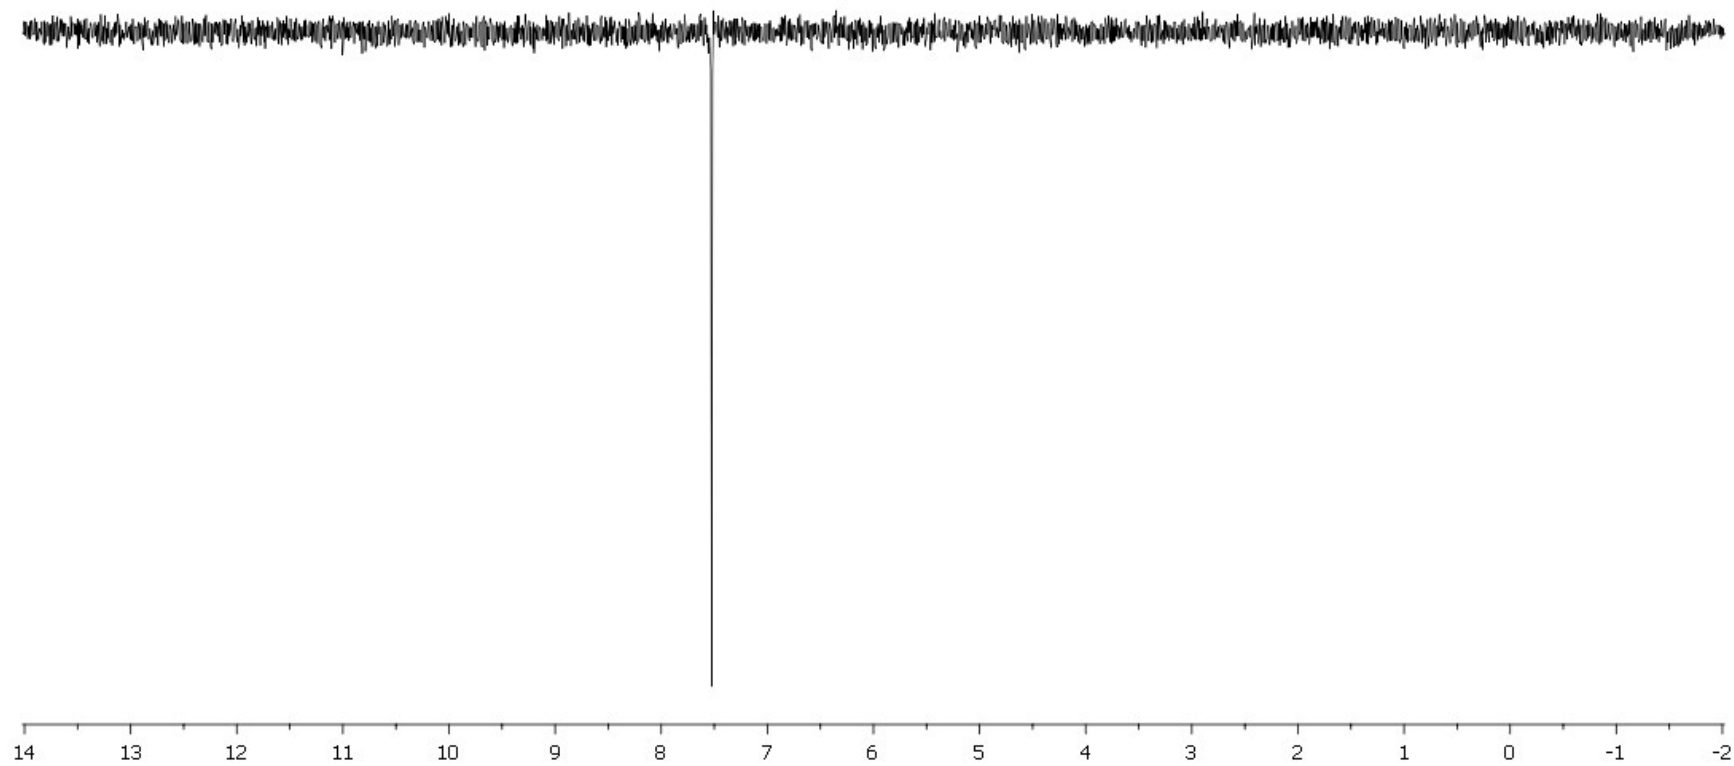

## Computational methods

All calculations were performed using Gaussian 03.<sup>1</sup> Density functional theory (DFT) calculations were carried out with B3LYP<sup>2</sup> functional and the 6-31 G\* set. The geometries were optimized by standard gradient techniques and characterized by evaluation of the Hessian matrix and the associated harmonic vibrational frequencies.

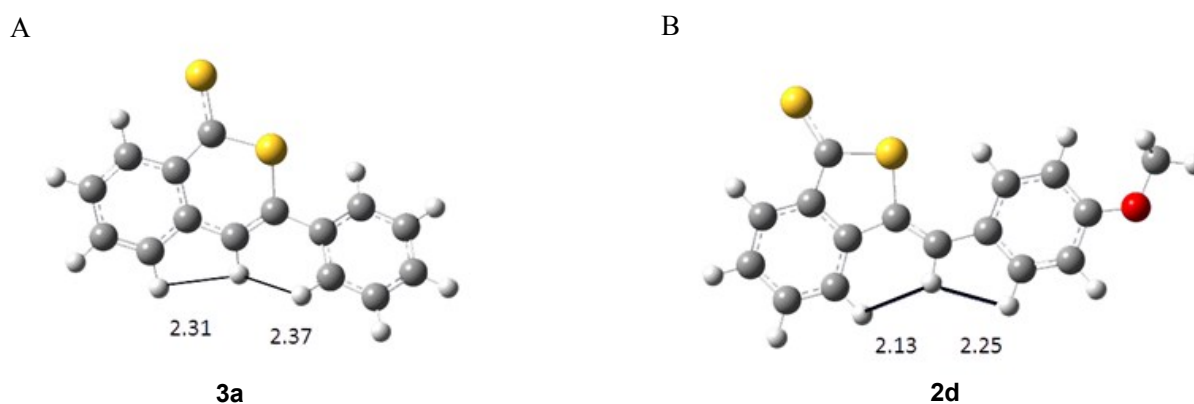

**Figure S1.** Molecular structure of compounds **3a** and **2d** optimized by Gaussian at 6-31g\*\*b3lyp level.

B3LYP76-31G\*\* optimized Cartesian coordinates of the:

### Compound 2a

C -5.282027 -0.349656 -0.028163

C -4.936484 0.978023 -0.288894

C -3.602976 1.369808 -0.250251

C -2.573535 0.447401 0.036123

C -2.944297 -0.885371 0.311101

C -4.280424 -1.273931 0.276836

C -1.204674 0.950530 0.040181

C -0.004397 0.317006 0.037767  
S 0.259047 -1.444211 -0.028198  
C 2.025936 -1.312930 -0.054223  
C 2.396534 0.100070 -0.006836  
C 1.300810 0.988777 0.045574  
S 3.015967 -2.628559 -0.121941  
C 3.713741 0.580790 -0.011322  
C 3.936267 1.949643 0.039381  
C 2.850254 2.838430 0.095745  
C 1.541077 2.369720 0.100672  
H -5.706717 1.707914 -0.519473  
H -3.341249 2.404806 -0.453928  
H -2.194523 -1.619353 0.580598  
H -4.541042 -2.305003 0.496030  
H -1.143977 2.036860 0.018618  
H 4.532474 -0.129977 -0.052807  
H 4.950617 2.335908 0.037774  
H 3.033317 3.908015 0.137965  
H 0.718250 3.075146 0.149943  
H -6.322195 -0.659860 -0.054649

**Compound 3a**

C -4.198419 -1.387107 -0.076574  
C -3.417342 -2.545441 -0.207473  
C -2.035281 -2.455316 -0.239634  
C -1.369517 -1.221417 -0.056733

C -2.174481 -0.045220 -0.010452  
C -3.577462 -0.152156 0.018962  
C 2.333318 -0.155855 -0.042226  
C 3.134863 0.787958 -0.707284  
C 4.524542 0.691876 -0.669175  
C 5.140266 -0.343060 0.035985  
C 4.354995 -1.281738 0.707985  
C 2.965851 -1.187293 0.674328  
C 0.068336 -1.183975 -0.185112  
C 0.853733 -0.082904 -0.088513  
S 0.178011 1.537009 0.114437  
C -1.623751 1.318017 0.095844  
H -5.281311 -1.457323 -0.052150  
H -3.895640 -3.517447 -0.284800  
H -1.435492 -3.355190 -0.342940  
H -4.151277 0.762368 0.118789  
H 2.666436 1.587074 -1.273039  
H 5.126507 1.425648 -1.196763  
H 6.223286 -0.414538 0.066844  
H 4.824877 -2.082297 1.271670  
H 2.361801 -1.900396 1.226253  
H 0.556832 -2.129092 -0.405918  
S -2.482631 2.621928 0.221343

## Compound 2d

|   |           |           |           |
|---|-----------|-----------|-----------|
| C | 4.555280  | -0.238993 | -0.000150 |
| C | 4.076496  | -1.559159 | -0.000055 |
| C | 2.715166  | -1.799902 | -0.000089 |
| C | 1.766210  | -0.749011 | -0.000175 |
| C | 2.272737  | 0.565524  | -0.000271 |
| C | 3.640604  | 0.823230  | -0.000273 |
| C | 0.360312  | -1.116405 | -0.000197 |
| C | -0.785353 | -0.384878 | -0.000044 |
| S | -0.905359 | 1.391745  | 0.000015  |
| C | -2.677067 | 1.408227  | -0.000049 |
| C | -3.160055 | 0.030295  | -0.000038 |
| C | -2.139411 | -0.946578 | 0.000002  |
| S | -3.555871 | 2.804067  | 0.000005  |
| C | -4.512805 | -0.340804 | 0.000003  |
| C | -4.847111 | -1.687067 | 0.000115  |
| C | -3.836644 | -2.663463 | 0.000212  |
| C | -2.493743 | -2.304870 | 0.000170  |
| O | 5.906810  | -0.099059 | -0.000237 |
| C | 6.454209  | 1.213488  | 0.000681  |
| H | 4.794474  | -2.372232 | 0.000043  |
| H | 2.361821  | -2.827669 | -0.000003 |
| H | 1.601184  | 1.415054  | -0.000400 |
| H | 3.981671  | 1.851263  | -0.000358 |
| H | 0.202545  | -2.193167 | -0.000247 |
| H | -5.269654 | 0.436565  | -0.000047 |

|   |           |           |           |
|---|-----------|-----------|-----------|
| H | -5.889706 | -1.988999 | 0.000145  |
| H | -4.106962 | -3.715341 | 0.000351  |
| H | -1.732038 | -3.077541 | 0.000291  |
| H | 7.537110  | 1.085488  | 0.001198  |
| H | 6.156410  | 1.774562  | -0.893474 |
| H | 6.155401  | 1.773695  | 0.895040  |

### Compound 3d

|   |           |           |           |
|---|-----------|-----------|-----------|
| C | -3.750573 | 0.718447  | 0.523595  |
| C | -2.358262 | 0.793578  | 0.535740  |
| C | -1.563965 | -0.201221 | -0.053260 |
| C | -2.220207 | -1.283331 | -0.675048 |
| C | -3.602254 | -1.371521 | -0.690859 |
| C | -4.382084 | -0.369892 | -0.090248 |
| C | -0.088839 | -0.135846 | -0.029749 |
| C | 0.709989  | -1.224427 | 0.106040  |
| C | 2.149568  | -1.216217 | 0.115962  |
| C | 2.934904  | -0.026979 | 0.025123  |
| C | 2.347805  | 1.308886  | -0.093265 |
| S | 0.597764  | 1.478160  | -0.217170 |
| S | 3.187559  | 2.747176  | -0.159817 |
| C | 2.815541  | -2.457599 | 0.239795  |
| C | 4.195139  | -2.541046 | 0.265620  |
| C | 4.966940  | -1.371571 | 0.171215  |

|   |           |           |           |
|---|-----------|-----------|-----------|
| C | 4.343404  | -0.142988 | 0.056044  |
| O | -5.728923 | -0.546667 | -0.162818 |
| C | -6.572581 | 0.443550  | 0.409800  |
| H | -4.325810 | 1.503626  | 0.998763  |
| H | -1.886083 | 1.633696  | 1.035316  |
| H | -1.633455 | -2.049009 | -1.172462 |
| H | -4.107380 | -2.199446 | -1.176822 |
| H | 0.229238  | -2.188810 | 0.246362  |
| H | 2.215348  | -3.359989 | 0.313762  |
| H | 4.678484  | -3.509063 | 0.358843  |
| H | 6.050738  | -1.429040 | 0.190123  |
| H | 4.924988  | 0.768701  | -0.014602 |
| H | -7.594155 | 0.107633  | 0.228821  |
| H | -6.408957 | 0.536773  | 1.490569  |
| H | -6.423898 | 1.421949  | -0.063367 |



**X-ray crystallographic data for  
(Z)-3-benzylidenebenzo[c]thiophene-1(3H)-thione (2a)<sup>2</sup>**

**Table S2.** Crystallographic data

| <b><i>Crystal data</i></b>                                              |                                                                                                                                                                                                                                            |
|-------------------------------------------------------------------------|--------------------------------------------------------------------------------------------------------------------------------------------------------------------------------------------------------------------------------------------|
| Chemical formula: C <sub>15</sub> H <sub>10</sub> S <sub>2</sub>        | <i>Mr</i> = 254.35                                                                                                                                                                                                                         |
| Orthorhombic, <i>P</i> 2 <sub>1</sub> 2 <sub>1</sub> 2 <sub>1</sub>     | <i>D</i> <sub>x</sub> = 1.367 Mg m <sup>-3</sup>                                                                                                                                                                                           |
| Hall symbol: P 2ac 2ab                                                  | Mo <i>K</i> α radiation, λ = 0.71073 Å                                                                                                                                                                                                     |
| <i>a</i> = 5.7002 (4) Å                                                 | Cell parameters from 124 reflections                                                                                                                                                                                                       |
| <i>b</i> = 13.2911 (16) Å                                               | μ = 0.40 mm <sup>-1</sup>                                                                                                                                                                                                                  |
| <i>c</i> = 16.3160 (17) Å                                               | <i>T</i> = 293 K                                                                                                                                                                                                                           |
| <i>V</i> = 1236.1 (2) Å <sup>3</sup>                                    | Crystal: white block                                                                                                                                                                                                                       |
| <i>Z</i> = 4                                                            | Crystal size: 0.25 × 0.13 × 0.03 mm                                                                                                                                                                                                        |
| <i>F</i> (000) = 528                                                    |                                                                                                                                                                                                                                            |
| <b><i>Data collection</i></b>                                           |                                                                                                                                                                                                                                            |
| Diffraction: Bruker-Nonius KappaCCD                                     | <i>R</i> <sub>int</sub> = 0.114                                                                                                                                                                                                            |
| Radiation source: Mo <i>K</i> α, λ = 0.71073 Å                          | θ <sub>max</sub> = 27.5°, θ <sub>min</sub> = 3.8°                                                                                                                                                                                          |
| Scan mode: φ/ω                                                          | <i>H</i> = -6 → 7                                                                                                                                                                                                                          |
| 15019 measured reflections                                              | <i>K</i> = -16 → 17                                                                                                                                                                                                                        |
| 2829 independent reflections                                            | <i>L</i> = -21 → 21                                                                                                                                                                                                                        |
| <b><i>Refinement</i></b>                                                |                                                                                                                                                                                                                                            |
| Refinement on <i>F</i> <sup>2</sup>                                     | Hydrogen site location: mixed.<br>H atoms treated by a mixture of independent and constrained refinement                                                                                                                                   |
| <i>R</i> [ <i>F</i> <sup>2</sup> > 2σ( <i>F</i> <sup>2</sup> )] = 0.048 | Δρ <sub>max</sub> = 0.16 e Å <sup>-3</sup>                                                                                                                                                                                                 |
| <i>wR</i> ( <i>F</i> <sup>2</sup> ) = 0.123                             | Δρ <sub>min</sub> = -0.21 e Å <sup>-3</sup>                                                                                                                                                                                                |
| <i>S</i> = 0.97                                                         | Absolute structure: Flack <i>x</i> determined using 604 quotients [( <i>I</i> <sup>+</sup> )-( <i>I</i> <sup>-</sup> )]/[( <i>I</i> <sup>+</sup> )+( <i>I</i> <sup>-</sup> )] (Parsons, Flack and Wagner, Acta Cryst. B69 (2013) 249-259). |
| 2829 reflections                                                        |                                                                                                                                                                                                                                            |
| 157 refined parameters                                                  |                                                                                                                                                                                                                                            |
| Programs: SIR2014, <sup>3</sup> SHELXL-2014 <sup>4</sup>                |                                                                                                                                                                                                                                            |

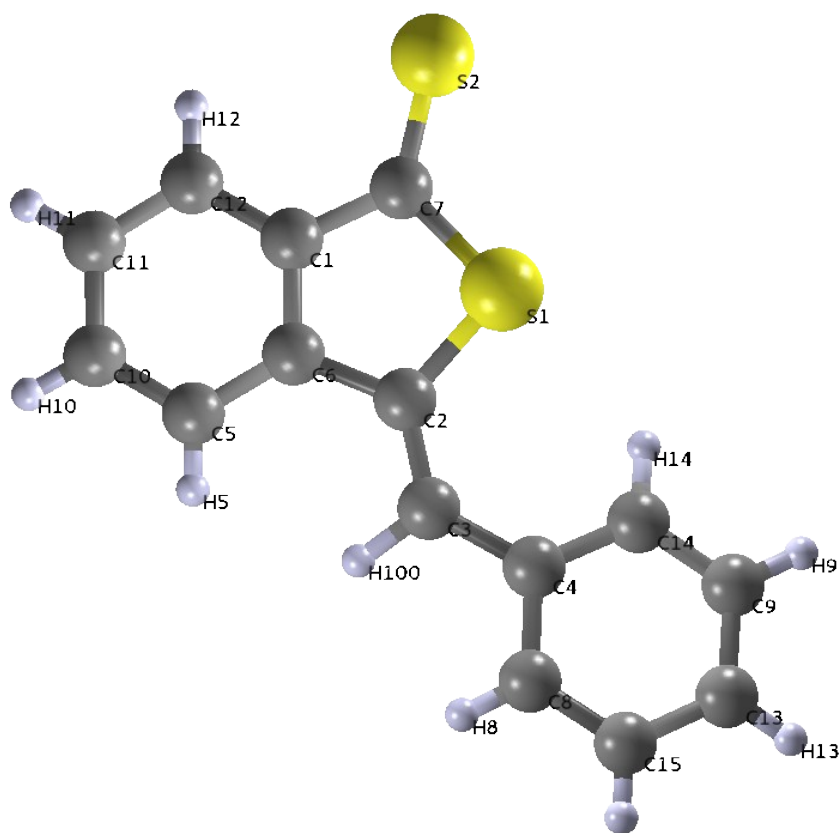

**Figure S2.** Asymmetric unit of (Z)-3-Benzylidenebenzo[c]thiophene-1(3H)-thione **2a**

**Table S3.** Fractional atomic coordinates and isotropic or equivalent isotropic displacement parameters ( $\text{\AA}^2$ )

|    | <i>x</i>    | <i>y</i>     | <i>z</i>    | <i>U</i> <sub>iso</sub> <sup>*</sup> / <i>U</i> <sub>eq</sub> |
|----|-------------|--------------|-------------|---------------------------------------------------------------|
| S1 | 0.0994 (2)  | 0.11137 (9)  | 0.22447 (7) | 0.0539 (3)                                                    |
| S2 | -0.3030 (3) | 0.02626 (11) | 0.13206 (9) | 0.0710 (4)                                                    |
| C1 | -0.1476 (7) | 0.2258 (3)   | 0.1261 (2)  | 0.0452 (10)                                                   |
| C2 | 0.1854 (7)  | 0.2389 (3)   | 0.2149 (2)  | 0.0463 (9)                                                    |
| C3 | 0.3660 (8)  | 0.2842 (4)   | 0.2545 (2)  | 0.0489 (10)                                                   |
| C4 | 0.5274 (7)  | 0.2474 (4)   | 0.3167 (2)  | 0.0475 (10)                                                   |
| C5 | 0.0325 (8)  | 0.3907 (4)   | 0.1334 (3)  | 0.0545 (11)                                                   |
| H5 | 0.1478      | 0.4338       | 0.1532      | 0.065*                                                        |
| C6 | 0.0273 (8)  | 0.2889 (3)   | 0.1572 (3)  | 0.0446 (10)                                                   |

|      |             |            |            |             |
|------|-------------|------------|------------|-------------|
| C7   | -0.1339 (8) | 0.1223 (3) | 0.1563 (2) | 0.0493 (10) |
| C8   | 0.7145 (8)  | 0.3118 (4) | 0.3392 (3) | 0.0553 (11) |
| H8   | 0.7313      | 0.3738     | 0.3134     | 0.066*      |
| C9   | 0.6677 (9)  | 0.1293 (4) | 0.4186 (3) | 0.0594 (12) |
| H9   | 0.6519      | 0.0680     | 0.4455     | 0.071*      |
| C10  | -0.1387 (9) | 0.4257 (4) | 0.0794 (3) | 0.0588 (12) |
| H10  | -0.1365     | 0.4928     | 0.0632     | 0.071*      |
| C11  | -0.3115 (9) | 0.3627 (4) | 0.0494 (3) | 0.0587 (12) |
| H11  | -0.4239     | 0.3879     | 0.0135     | 0.070*      |
| C12  | -0.3186 (8) | 0.2626 (4) | 0.0724 (3) | 0.0533 (11) |
| H12  | -0.4354     | 0.2203     | 0.0524     | 0.064*      |
| C13  | 0.8492 (9)  | 0.1933 (4) | 0.4392 (3) | 0.0626 (13) |
| H13  | 0.9554      | 0.1754     | 0.4799     | 0.075*      |
| C14  | 0.5098 (8)  | 0.1558 (4) | 0.3584 (3) | 0.0559 (11) |
| H14  | 0.3888      | 0.1118     | 0.3451     | 0.067*      |
| C15  | 0.8718 (9)  | 0.2836 (4) | 0.3990 (3) | 0.0607 (13) |
| H15  | 0.9953      | 0.3262     | 0.4123     | 0.073*      |
| H100 | 0.378 (9)   | 0.363 (4)  | 0.243 (3)  | 0.073*      |

**Table S4.** Atomic displacement parameters ( $\text{\AA}^2$ )

|    | <i>U</i> 11 | <i>U</i> 22 | <i>U</i> 33 | <i>U</i> 12  | <i>U</i> 13 | <i>U</i> 23  |
|----|-------------|-------------|-------------|--------------|-------------|--------------|
| S1 | 0.0569 (6)  | 0.0467 (6)  | 0.0583 (6)  | -0.0033 (5)  | -0.0036 (6) | 0.0026 (5)   |
| S2 | 0.0771 (9)  | 0.0592 (8)  | 0.0767 (9)  | -0.0224 (7)  | -0.0090 (7) | 0.0002 (6)   |
| C1 | 0.044 (2)   | 0.049 (2)   | 0.043 (2)   | -0.0007 (18) | 0.0077 (19) | -0.0042 (18) |
| C2 | 0.046 (2)   | 0.049 (2)   | 0.044 (2)   | 0.0008 (19)  | 0.008 (2)   | -0.0016 (18) |
| C3 | 0.046 (2)   | 0.055 (3)   | 0.045 (2)   | 0.000 (2)    | 0.0065 (18) | -0.0036 (19) |
| C4 | 0.043 (2)   | 0.057 (3)   | 0.043 (2)   | 0.001 (2)    | 0.0053 (18) | -0.004 (2)   |
| C5 | 0.059 (3)   | 0.050 (2)   | 0.055 (2)   | -0.003 (2)   | 0.001 (2)   | -0.001 (2)   |
| C6 | 0.046 (2)   | 0.047 (2)   | 0.041 (2)   | -0.0004 (18) | 0.0085 (17) | -0.0028 (17) |
| C7 | 0.052 (3)   | 0.052 (2)   | 0.044 (2)   | -0.003 (2)   | 0.0055 (19) | -0.0054 (19) |
| C8 | 0.054 (3)   | 0.056 (3)   | 0.056 (3)   | -0.006 (2)   | 0.007 (2)   | -0.005 (2)   |
| C9 | 0.062 (3)   | 0.063 (3)   | 0.053 (3)   | 0.007 (2)    | -0.002 (2)  | -0.002 (2)   |

|     |           |           |           |            |            |            |
|-----|-----------|-----------|-----------|------------|------------|------------|
| C10 | 0.072 (3) | 0.046 (2) | 0.058 (3) | 0.007 (2)  | 0.002 (3)  | 0.000 (2)  |
| C11 | 0.060 (3) | 0.064 (3) | 0.052 (3) | 0.013 (2)  | -0.008 (2) | -0.003 (2) |
| C12 | 0.049 (2) | 0.060 (3) | 0.050 (2) | -0.001 (2) | 0.000 (2)  | -0.005 (2) |
| C13 | 0.059 (3) | 0.077 (4) | 0.051 (3) | 0.011 (3)  | -0.008 (2) | -0.005 (2) |
| C14 | 0.052 (3) | 0.060 (3) | 0.056 (3) | -0.004 (2) | 0.000 (2)  | 0.000 (2)  |
| C15 | 0.047 (3) | 0.075 (3) | 0.060 (3) | -0.007 (2) | -0.003 (2) | -0.013 (2) |

**Table S5.** Geometric parameters (Å, °)

|           |           |             |           |
|-----------|-----------|-------------|-----------|
| S1—C7     | 1.740 (5) | C4—C8       | 1.416 (6) |
| S1—C2     | 1.772 (4) | C5—C10      | 1.394 (7) |
| S2—C7     | 1.647 (5) | C5—C6       | 1.408 (6) |
| C1—C6     | 1.398 (6) | C8—C15      | 1.376 (7) |
| C1—C12    | 1.400 (6) | C9—C14      | 1.379 (6) |
| C1—C7     | 1.463 (6) | C9—C13      | 1.381 (7) |
| C2—C3     | 1.357 (6) | C10—C11     | 1.382 (7) |
| C2—C6     | 1.462 (6) | C11—C12     | 1.384 (7) |
| C3—C4     | 1.455 (6) | C13—C15     | 1.373 (7) |
| C4—C14    | 1.397 (6) |             |           |
| C7—S1—C2  | 94.3 (2)  | C1—C6—C2    | 113.6 (4) |
| C6—C1—C12 | 120.9 (4) | C5—C6—C2    | 127.0 (4) |
| C6—C1—C7  | 113.8 (4) | C1—C7—S2    | 128.0 (3) |
| C12—C1—C7 | 125.2 (4) | C1—C7—S1    | 109.5 (3) |
| C3—C2—C6  | 125.0 (4) | S2—C7—S1    | 122.5 (3) |
| C3—C2—S1  | 126.3 (3) | C15—C8—C4   | 120.6 (5) |
| C6—C2—S1  | 108.7 (3) | C14—C9—C13  | 120.3 (5) |
| C2—C3—C4  | 131.6 (4) | C11—C10—C5  | 121.4 (4) |
| C14—C4—C8 | 117.0 (4) | C12—C11—C10 | 120.5 (5) |
| C14—C4—C3 | 125.9 (4) | C11—C12—C1  | 119.1 (4) |
| C8—C4—C3  | 117.0 (4) | C15—C13—C9  | 119.5 (5) |
| C10—C5—C6 | 118.7 (4) | C9—C14—C4   | 121.5 (4) |
| C1—C6—C5  | 119.4 (4) | C13—C15—C8  | 121.0 (5) |

**X-ray crystallographic data for  
3-(4-methoxyphenyl)-1H-isothiochromene-1-thione (3d)<sup>5</sup>**

**Table S6.** Crystallographic data

| <b><i>Crystal data</i></b>                                              |                                                                                                            |
|-------------------------------------------------------------------------|------------------------------------------------------------------------------------------------------------|
| Chemical formula: C <sub>16</sub> H <sub>12</sub> OS <sub>2</sub>       | <i>M<sub>r</sub></i> = 284.38                                                                              |
| Monoclinic, <i>P</i> 2 <sub>1</sub> / <i>n</i>                          | <i>D<sub>x</sub></i> = 1.422 Mg m <sup>-3</sup>                                                            |
| Hall symbol: - <i>P</i> 2yn                                             | Mo <i>K</i> α radiation, λ = 0.71073 Å                                                                     |
| <i>a</i> = 3.9659 (5) Å                                                 | Cell parameters from 126 reflections                                                                       |
| <i>c</i> = 20.518 (5) Å                                                 | μ = 0.39 mm <sup>-1</sup>                                                                                  |
| β = 91.920 (16)°                                                        | <i>T</i> = 293 K                                                                                           |
| <i>V</i> = 1328.7 (4) Å <sup>3</sup>                                    | Crystal: yellow needle                                                                                     |
| <i>Z</i> = 4                                                            | Crystal size: 0.35 × 0.08 × 0.03 mm                                                                        |
| <i>F</i> (000) = 592                                                    |                                                                                                            |
| <b><i>Data collection</i></b>                                           |                                                                                                            |
| Diffractometer: Bruker-Nonius KappaCCD                                  | <i>R</i> <sub>int</sub> = 0.135                                                                            |
| Radiation source: Mo <i>K</i> α, λ = 0.71073 Å                          | θ <sub>max</sub> = 27.6°, θ <sub>min</sub> = 2.4°                                                          |
| Scan mode: φ/ω                                                          | <i>H</i> = -5 → 5                                                                                          |
| 26857 measured reflections                                              | <i>K</i> = -20 → 21                                                                                        |
| 3085 independent reflections                                            | <i>L</i> = -26 → 26                                                                                        |
| 1719 reflections with <i>I</i> > 2σ( <i>I</i> )                         |                                                                                                            |
| <b><i>Refinement</i></b>                                                |                                                                                                            |
| Refinement on <i>F</i> <sup>2</sup>                                     | Hydrogen site location: mixed<br>H atoms treated by a mixture of independent<br>and constrained refinement |
| <i>R</i> [ <i>F</i> <sup>2</sup> > 2σ( <i>F</i> <sup>2</sup> )] = 0.054 | Δρ <sub>max</sub> = 0.20 e Å <sup>-3</sup>                                                                 |
| <i>wR</i> ( <i>F</i> <sup>2</sup> ) = 0.128                             | Δρ <sub>min</sub> = -0.24 e Å <sup>-3</sup>                                                                |
| <i>S</i> = 1.02                                                         | Programs: SIR2014, <sup>3</sup> SHELXL-2014 <sup>4</sup>                                                   |
| 3085 reflections                                                        |                                                                                                            |
| 177 refined parameters                                                  |                                                                                                            |

**Figure S3.** Asymmetric unit of 3-(4-methoxyphenyl)-1*H*-isothiochromene-1-thione **3d**

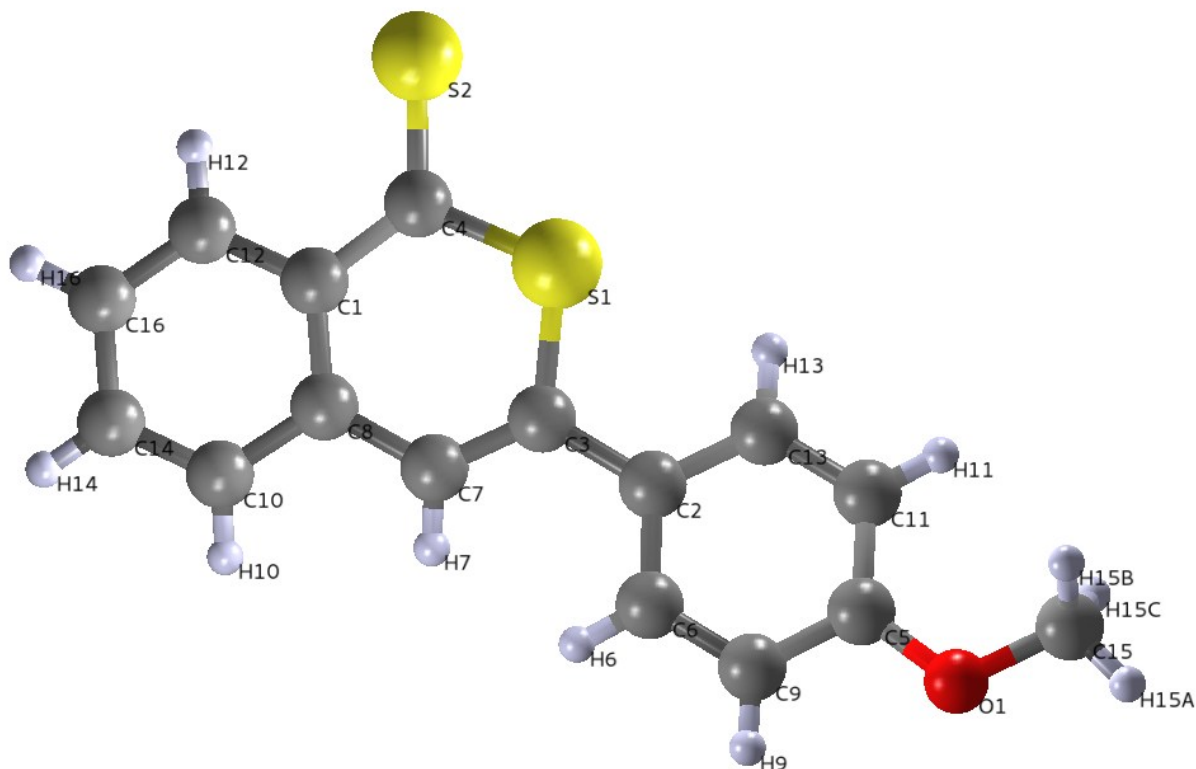

**Table S7.** Fractional atomic coordinates and isotropic or equivalent isotropic displacement parameters ( $\text{\AA}^2$ )

|    | <i>x</i>    | <i>y</i>      | <i>z</i>      | <i>U</i> iso*/ <i>U</i> eq |
|----|-------------|---------------|---------------|----------------------------|
| S1 | 0.0949 (2)  | 0.03568 (5)   | 0.17373 (4)   | 0.0419 (2)                 |
| S2 | 0.0283 (2)  | 0.17908 (5)   | 0.25078 (5)   | 0.0569 (3)                 |
| O1 | 0.3940 (6)  | -0.25688 (14) | -0.03908 (11) | 0.0550 (6)                 |
| C1 | -0.1919 (7) | 0.02816 (19)  | 0.29484 (14)  | 0.0406 (7)                 |
| C2 | 0.0863 (7)  | -0.11496 (17) | 0.11732 (14)  | 0.0355 (7)                 |
| C3 | -0.0144 (7) | -0.06791 (18) | 0.17493 (14)  | 0.0357 (7)                 |
| C4 | -0.0396 (7) | 0.07925 (18)  | 0.24530 (15)  | 0.0396 (7)                 |
| C5 | 0.2954 (7)  | -0.20637 (19) | 0.00987 (14)  | 0.0406 (7)                 |
| C6 | 0.0840 (8)  | -0.20005 (19) | 0.11795 (16)  | 0.0491 (8)                 |
| H6 | 0.0111      | -0.2273       | 0.1547        | 0.059*                     |

|      |              |               |               |             |
|------|--------------|---------------|---------------|-------------|
| C7   | -0.1695 (8)  | -0.0992 (2)   | 0.22673 (16)  | 0.0422 (7)  |
| H7   | -0.236 (7)   | -0.152 (2)    | 0.2240 (15)   | 0.048 (9)*  |
| C8   | -0.2550 (7)  | -0.05616 (19) | 0.28481 (14)  | 0.0385 (7)  |
| C9   | 0.1877 (9)   | -0.2451 (2)   | 0.06518 (16)  | 0.0546 (9)  |
| H9   | 0.1848       | -0.3020       | 0.0670        | 0.066*      |
| C10  | -0.4051 (8)  | -0.1006 (2)   | 0.33503 (16)  | 0.0505 (8)  |
| H10  | -0.4498      | -0.1560       | 0.3289        | 0.061*      |
| C11  | 0.2958 (8)   | -0.1227 (2)   | 0.00741 (16)  | 0.0493 (8)  |
| H11  | 0.3648       | -0.0959       | -0.0299       | 0.059*      |
| C12  | -0.2779 (9)  | 0.0638 (2)    | 0.35413 (16)  | 0.0523 (9)  |
| H12  | -0.2373      | 0.1193        | 0.3611        | 0.063*      |
| C13  | 0.1933 (8)   | -0.0779 (2)   | 0.06056 (16)  | 0.0493 (8)  |
| H13  | 0.1960       | -0.0211       | 0.0582        | 0.059*      |
| C14  | -0.4867 (9)  | -0.0646 (2)   | 0.39246 (17)  | 0.0591 (10) |
| H14  | -0.5854      | -0.0954       | 0.4248        | 0.071*      |
| C15  | 0.5327 (8)   | -0.2205 (2)   | -0.09518 (15) | 0.0524 (9)  |
| H15A | 0.6036       | -0.2626       | -0.1243       | 0.079*      |
| H15B | 0.7231       | -0.1873       | -0.0822       | 0.079*      |
| H15C | 0.3649       | -0.1869       | -0.1169       | 0.079*      |
| C16  | -0.4216 (10) | 0.0181 (2)    | 0.40234 (17)  | 0.0627 (10) |
| H16  | -0.4751      | 0.0427        | 0.4416        | 0.075*      |

**Table S8.** Atomic displacement parameters ( $\text{\AA}^2$ )

|    | <i>U</i> 11 | <i>U</i> 22 | <i>U</i> 33 | <i>U</i> 12  | <i>U</i> 13  | <i>U</i> 23  |
|----|-------------|-------------|-------------|--------------|--------------|--------------|
| S1 | 0.0510 (5)  | 0.0353 (4)  | 0.0398 (4)  | -0.0017 (4)  | 0.0089 (3)   | 0.0003 (4)   |
| S2 | 0.0780 (6)  | 0.0371 (5)  | 0.0559 (6)  | -0.0023 (4)  | 0.0079 (5)   | -0.0059 (4)  |
| O1 | 0.0710 (15) | 0.0491 (14) | 0.0461 (14) | -0.0005 (11) | 0.0189 (11)  | -0.0064 (11) |
| C1 | 0.0406 (17) | 0.0457 (19) | 0.0355 (17) | 0.0056 (14)  | 0.0014 (13)  | 0.0032 (15)  |
| C2 | 0.0356 (15) | 0.0380 (17) | 0.0328 (16) | -0.0015 (13) | -0.0010 (12) | -0.0005 (13) |
| C3 | 0.0334 (15) | 0.0361 (16) | 0.0374 (17) | 0.0026 (12)  | -0.0007 (13) | 0.0016 (13)  |
| C4 | 0.0409 (17) | 0.0397 (17) | 0.0380 (17) | 0.0041 (13)  | -0.0001 (13) | -0.0028 (14) |
| C5 | 0.0413 (17) | 0.0458 (18) | 0.0349 (17) | -0.0004 (14) | 0.0044 (13)  | -0.0033 (14) |

|     |             |             |             |              |             |              |
|-----|-------------|-------------|-------------|--------------|-------------|--------------|
| C6  | 0.063 (2)   | 0.0401 (19) | 0.045 (2)   | 0.0023 (15)  | 0.0160 (16) | 0.0088 (15)  |
| C7  | 0.0485 (18) | 0.0388 (19) | 0.0394 (19) | -0.0032 (15) | 0.0038 (14) | 0.0004 (15)  |
| C8  | 0.0396 (17) | 0.0436 (19) | 0.0324 (17) | 0.0051 (13)  | 0.0022 (13) | 0.0022 (14)  |
| C9  | 0.080 (3)   | 0.0350 (18) | 0.050 (2)   | 0.0016 (17)  | 0.0177 (18) | 0.0014 (16)  |
| C10 | 0.061 (2)   | 0.047 (2)   | 0.044 (2)   | 0.0029 (16)  | 0.0119 (16) | 0.0075 (16)  |
| C11 | 0.065 (2)   | 0.049 (2)   | 0.0344 (18) | -0.0082 (17) | 0.0150 (16) | 0.0002 (15)  |
| C12 | 0.070 (2)   | 0.046 (2)   | 0.042 (2)   | 0.0107 (17)  | 0.0064 (17) | -0.0037 (16) |
| C13 | 0.068 (2)   | 0.0348 (18) | 0.046 (2)   | -0.0074 (15) | 0.0140 (17) | 0.0005 (15)  |
| C14 | 0.073 (2)   | 0.064 (2)   | 0.041 (2)   | 0.0067 (19)  | 0.0162 (18) | 0.0091 (18)  |
| C15 | 0.055 (2)   | 0.064 (2)   | 0.0390 (19) | 0.0046 (17)  | 0.0133 (16) | -0.0037 (17) |
| C16 | 0.083 (3)   | 0.069 (3)   | 0.037 (2)   | 0.016 (2)    | 0.0157 (18) | -0.0041 (18) |

**Table S9.** Geometric parameters (Å, °)

|           |             |           |           |
|-----------|-------------|-----------|-----------|
| S1—C4     | 1.732 (3)   | C3—C7     | 1.347 (4) |
| S1—C3     | 1.747 (3)   | C5—C11    | 1.368 (4) |
| S2—C4     | 1.656 (3)   | C5—C9     | 1.380 (4) |
| O1—C5     | 1.367 (3)   | C6—C9     | 1.383 (4) |
| O1—C15    | 1.422 (4)   | C7—C8     | 1.434 (4) |
| C1—C12    | 1.401 (4)   | C8—C10    | 1.409 (4) |
| C1—C8     | 1.414 (4)   | C10—C14   | 1.365 (4) |
| C1—C4     | 1.462 (4)   | C11—C13   | 1.386 (4) |
| C2—C6     | 1.390 (4)   | C12—C16   | 1.378 (5) |
| C2—C13    | 1.391 (4)   | C14—C16   | 1.390 (5) |
| C2—C3     | 1.476 (4)   |           |           |
| C4—S1—C3  | 107.61 (15) | O1—C5—C9  | 115.5 (3) |
| C5—O1—C15 | 118.0 (2)   | C11—C5—C9 | 119.3 (3) |
| C12—C1—C8 | 119.0 (3)   | C9—C6—C2  | 121.5 (3) |
| C12—C1—C4 | 119.0 (3)   | C3—C7—C8  | 126.7 (3) |
| C8—C1—C4  | 122.0 (3)   | C10—C8—C1 | 118.2 (3) |
| C6—C2—C13 | 116.4 (3)   | C10—C8—C7 | 118.2 (3) |
| C6—C2—C3  | 120.7 (3)   | C1—C8—C7  | 123.6 (3) |
| C13—C2—C3 | 122.8 (3)   | C5—C9—C6  | 120.5 (3) |



|           |             |             |           |
|-----------|-------------|-------------|-----------|
| C7—C3—C2  | 125.3 (3)   | C14—C10—C8  | 121.8 (3) |
| C7—C3—S1  | 119.9 (2)   | C5—C11—C13  | 119.9 (3) |
| C2—C3—S1  | 114.8 (2)   | C16—C12—C1  | 121.1 (3) |
| C1—C4—S2  | 125.8 (2)   | C11—C13—C2  | 122.3 (3) |
| C1—C4—S1  | 120.1 (2)   | C10—C14—C16 | 119.8 (3) |
| S2—C4—S1  | 114.10 (18) | C12—C16—C14 | 120.1 (3) |
| O1—C5—C11 | 125.1 (3)   |             |           |

---

## References

1. M. J. Frisch, G. W. Trucks, H. B. Schlegel, G. E. Scuseria, M. A. Robb, J. R. Cheeseman, G. Scalmani, V. Barone, B. Mennucci, G. A. Petersson, H. Nakatsuji, M. Caricato, X. Li, H. P. Hratchian, A. F. Izmaylov, J. Bloino, G. Zheng, J. L. Sonnenberg, M. Hada, M. Ehara, K. Toyota, R. Fukuda, J. Hasegawa, M. Ishida, T. Nakajima, Y. Honda, O. Kitao, H. Nakai, T. Vreven, J. A. Montgomery, Jr., J. E. Peralta, F. Ogliaro, M. Bearpark, J. J. Heyd, E. Brothers, K. N. Kudin, V. N. Staroverov, R. Kobayashi, J. Normand, K. Raghavachari, A. Rendell, J. C. Burant, S. S. Iyengar, J. Tomasi, M. Cossi, N. Rega, J. M. Millam, M. Klene, J. E. Knox, J. B. Cross, V. Bakken, C. Adamo, J. Jaramillo, R. Gomperts, R. E. Stratmann, O. Yazyev, A. J. Austin, R. Cammi, C. Pomelli, J. W. Ochterski, R. L. Martin, K. Morokuma, V. G. Zakrzewski, G. A. Voth, P. Salvador, J. J. Dannenberg, S. Dapprich, A. D. Daniels, O. Farkas, J. B. Foresman, J. V. Ortiz, J. Cioslowski and D. J. Fox, Gaussian, Inc., Wallingford CT, 2010.
2. X-ray Crystallographic Information File CIFdata.cif contains the supplementary crystallographic data for this product (**2a**), and is supplied as independent Supporting Information files for this article. This file can also be obtained free of charge from the Cambridge Crystallographic Data Centre via [www.ccdc.cam.ac.uk/data\\_request/cif](http://www.ccdc.cam.ac.uk/data_request/cif) (CCDC 1442210).
3. M. C. Burla, R. Caliandro, B. Carrozzini, G. L. Casciarano, C. Cuocci, C. Giacovazzo, M. Mallamo, A. Mazzone and G. Polidori, *J. Appl. Cryst.*, 2015, **48**, 306-309.
4. G. M. Sheldrick, *Acta Cryst. C*, 2015, **C71**, 3-8.
5. X-ray Crystallographic Information File CIFdata.cif contains the supplementary crystallographic data for this product (**3d**), and is supplied as independent Supporting Information files for this article. This file can also be obtained free of charge from the Cambridge Crystallographic Data Centre via [www.ccdc.cam.ac.uk/data\\_request/cif](http://www.ccdc.cam.ac.uk/data_request/cif) (CCDC 1442211).
